# 1 **Genome of the giant panda roundworm illuminates its host shift and parasitic** 2 **adaptation**

3  
4 Yue Xie<sup>1,#</sup>, Sen Wang<sup>2,#</sup>, Shuangyang Wu<sup>3,4,#</sup>, Shenghan Gao<sup>3,#</sup>, Qingshu Meng<sup>5,#</sup>, Chengdong  
5 Wang<sup>6</sup>, Jingchao Lan<sup>6</sup>, Li Luo<sup>6</sup>, Xuan Zhou<sup>1,7</sup>, Jing Xu<sup>1</sup>, Xiaobin Gu<sup>1</sup>, Ran He<sup>1</sup>, Zijiang Yang<sup>8</sup>,  
6 Xuerong Peng<sup>9</sup>, Songnian Hu<sup>3,10,\*</sup>, Guangyou Yang<sup>1,\*</sup>

7  
8 <sup>1</sup> *Department of Parasitology, College of Veterinary Medicine, Sichuan Agricultural University,*  
9 *Chengdu, Sichuan 611130, China*

10 <sup>2</sup> *Agricultural Genomics Institute, Chinese Academy of Agricultural Sciences, Shenzhen,*  
11 *Guangdong 518120, China*

12 <sup>3</sup> *State Key Laboratory of Microbial Resources, Institute of Microbiology, Chinese Academy of*  
13 *Sciences, Beijing 100101, China*

14 <sup>4</sup> *Department of Oncology-Pathology, Karolinska Institutet, Karolinska University Hospital,*  
15 *Bioclinicum, Solna 17164, Sweden*

16 <sup>5</sup> *Department of Urology, Feinberg School of Medicine, Northwestern University, Chicago, IL 60611,*  
17 *USA*

18 <sup>6</sup> *The Sichuan Key Laboratory for Conservation Biology on Endangered Wildlife-Developing*  
19 *toward a State Key Laboratory for China, Chengdu Research Base of Giant Panda Breeding,*  
20 *Chengdu, Sichuan 610081, China*

21 <sup>7</sup> *Institute of Animal Genetics and Breeding, College of Animal Science and Technology, Sichuan*  
22 *Agricultural University, Chengdu, Sichuan 611130, China*

23 <sup>8</sup> *Department of Civil and Environmental Engineering, University of Maryland, College Park, MD*  
24 *20740, USA*

25 <sup>9</sup> *Department of Chemistry, College of Life and Basic Science, Sichuan Agricultural University,*  
26 *Chengdu, Sichuan 611130, China*

27 <sup>10</sup> *University of Chinese Academy of Sciences, Beijing 100049, China*

28  
29 # Equal contribution.

30 \* Corresponding authors.

31 E-mails: [husn@im.ac.cn](mailto:husn@im.ac.cn) (Hu S.); [guangyou1963@aliyun.com](mailto:guangyou1963@aliyun.com) (Yang G.).

32  
33 Running title: Xie Y et al/*Baylisascaris schroederi* genome

34  
35 Counts of words: 7733

36 Figures: 6

37 Tables: 1

38 Supplementary figures: 13

39 Supplementary tables: 23

40 Supplementary file: 1

41 **Abstract**

42 *Baylisascaris schroederi*, a bamboo-feeding giant panda (*Ailuropoda melanoleuca*)-specific  
43 roundworm (ascaridoid) parasite, is the causative agent of baylisascariasis, which represents a  
44 leading reason for the mortality of wild giant panda populations and therefore poses a significant  
45 threat to giant panda conservation. Here we present a 293-Mb chromosome-level genome assembly  
46 of *B. schroederi* to inform its biology, including host adaptations. Comparative genomics revealed  
47 an evolutionary trajectory accompanied by host-shift events in ascaridoid parasite lineages after  
48 host separations, suggesting their potential transmissions and fast adaptations to hosts. Genomic and  
49 anatomical lines of evidence, including expansion and positive selection of genes related to cuticle  
50 and basal metabolisms, indicates that *B. schroederi* undergoes specific adaptations to survive in the  
51 sharp-edged bamboo enriched gut of giant panda by structurally increasing its cuticle thickness and  
52 efficiently utilizing host nutrients during gut parasitism. Also, we characterized the secretome and  
53 predicted potential drug and vaccine targets for new interventions. Overall, this genome resource  
54 provides new insights into the host adaptation of *B. schroederi* to giant panda as well as the  
55 host-shift events in ascaridoid parasite lineages. These findings also add to our knowledge on the  
56 unique biology of the giant panda roundworm and aid the development of much-needed novel  
57 strategies for the control of baylisascariasis and thus the protection of giant panda populations.

58

59 **Keywords:** Giant panda; *Baylisascaris* genome; Host shift; Parasitism evolution; Host adaptation

## 60 **Introduction**

61 The giant panda (*Ailuropoda melanoleuca*) is an enigmatic and endangered mammalian species  
62 endemic to Western China. Unlike other bear members in Ursidae, which are carnivores or  
63 omnivores, the giant panda almost exclusively feeds on the highly fibrous bamboo but retains a  
64 carnivoran alimentary tract [1, 2]. Consequently, the giant panda exhibits very low digestive  
65 efficiency and low metabolic rates to achieve its daily energy balance [2]. Based on this  
66 physiological situation, the tract of giant pandas likely exhibits reduced nutrient digestibility and  
67 absorption and is full of undigested and sharp-edged bamboo culms/branches [3]: the former  
68 speculation explains why giant pandas spend most of each day consuming a remarkable quantity of  
69 bamboo relative to their body size [1], and the latter illustrates potential risks to the gastrointestinal  
70 system (e.g., physical damage to the stomach and guts) and tract-inhabiting organisms, including  
71 parasitic nematodes (e.g., physical pressure and damage to worm bodies) [3, 4].

72 The roundworm *Baylisascaris schroederi* is the only endoparasite that is consistently found in giant  
73 pandas and has been confirmed to be one of the leading causes of death in wild giant panda  
74 populations [5-7]. In nature, *B. schroederi* infection in giant pandas follows a trophic pathway from  
75 ingestion to lifecycle completion without intermediate hosts (Figure S1). The adults inhabit the  
76 intestines of giant pandas and can cause intestinal obstruction, inflammation and even host death; in  
77 addition, the larvae might disseminate into various body tissues and induce extensive inflammation  
78 and scarring of the intestinal wall and parenchyma of the liver and lungs (also known as visceral  
79 larva migrans, VLM) [4, 5, 7]. Parasitological evidence shows that *B. schroederi* has highly evolved  
80 to adapt to its host with one body size comparable to that of other ascaridoid parasites, including *A.*  
81 *suum* in pigs and *P. univalens* in horses [8]. Such physical adaptations to the nutrient-limited and  
82 fiber-enriched intestinal environment of giant pandas are likely related to nutritional metabolic  
83 changes and exoskeletal cuticle resistance. However, the detailed molecular mechanisms underlying  
84 these adaptation processes remain unknown. To address these concerns and strengthen efforts to  
85 control this parasite in giant pandas, we generated the 293-Mb chromosome-level genome assembly  
86 of *B. schroederi* and compared it with those of other ascaridoid species. The analysis identified a  
87 total of 16,072 nonredundant protein-coding genes in *B. schroederi*, and comparative genomics  
88 revealed the potential common ability of host shift among ascaridoid parasites and the coevolution  
89 of these species. During its parasitism processes, *B. schroederi* appears to have evolved a thicker  
90 cuticle against the harsh intestinal environment and specialised its metabolism pathways to better  
91 utilize the limited nutrients observed during parasitism in the giant panda gut. Moreover, the  
92 enriched proteases in *B. schroederi* are linked to potential roles in host evasion and  
93 immunoregulation. These findings provide a useful resource that can be used in a wide range of

94 fundamental biological studies of *Baylisascaris* and will strengthen the development of new  
95 interventions (drugs and vaccines) against baylisascariasis in the giant panda, which might  
96 constitute an epitome of wildlife conservation.

## 97 **Results**

### 98 **Genome and gene sets**

99 Using a combination of Illumina whole-genome shotgun technology, the PacBio single-molecule  
100 real-time (SMRT) sequencing platform and Hi-C scaffolding (Table S1), we produced a  
101 high-quality chromosome-level reference genome of *B. schroederi* that consisted of 293 megabases  
102 (Mb), had a scaffold N50 size of 11.8 Mb and was anchored to 27 chromosome-level  
103 pseudomolecules, which were numbered according to their collinearity with *A. suum* (Figure 1,  
104 Table 1, Figures S2 and S3, Table S2). The assembly size was larger than that of the horse *P.*  
105 *univalens* (253 Mb) [9], comparable to that of the swine *A. suum* (298 Mb) [10] and smaller than  
106 that of the dog *T. canis* (317 Mb) [11]. The GC content of the assembly was 37.59%, which is  
107 similar to that of *A. suum* (37.8%) but slightly lower than those of the *P. univalens* (39.1%) and *T.*  
108 *canis* (39.9%) assemblies. The completeness of the *B. schroederi* genome was estimated to achieve  
109 97.86% (961/982) coverage using the core BUSCO genes [12] and 91.18% mapping using the  
110 transcriptomic data, which indicated that the assembly represents a substantial proportion of the  
111 entire genome (Table 1, Tables S3 and S4). The *B. schroederi* genome contained 12.02% repetitive  
112 sequences, which was equal to 35.3 Mb of the assembly, and these included 0.49% DNA  
113 transposons, 2.86% retrotransposons, 5.75% unclassified dispersed elements and 2.61% simple  
114 repeats (Table S5). Moreover, 6,190 transfer RNA (tRNA) and 978 ribosomal RNA (rRNA) genes  
115 were identified in the assembled genome, and the copy numbers reflected their codon usage in  
116 protein-coding regions (Figure S4, Tables S6 and S7, File S1).

117 *De novo* predictions, homology-based searching and deep transcriptome sequencing at multiple  
118 lifecycle stages of *B. schroederi* identified a total of 16,072 protein-coding genes, with an average  
119 length of 9,452 bp, an exon length of 155 bp and an estimated 9.5 exons per gene (Table S8), which  
120 were comparable to the data obtained for *A. suum*, *P. univalens* and *T. canis* [9-11]. In addition,  
121 90.61% of the gene set was supported by the mapping of RNA-seq reads (Table S9) and had a  
122 homologue (BLASTP cutoff  $\leq 10^{-5}$ ) in *A. suum* (n=13,727; 85.41%), *P. univalens* (n=13,490;  
123 83.93%) or *T. canis* (n=13,873; 86.32%); in addition, 11,135 (69.28%) were homologous among the  
124 four ascaridoid species, and 1,283 (7.9%) were ‘unique’ to *B. schroederi* because no homologs were  
125 detected in any other ascaridoids for which genomic data are currently available (Figure S5). Using  
126 this gene set, we then performed functional annotation with public databases. In total, 14,968

127 (93.13%) and 14,831 (92.28%) genes had homologues in the Nr and InterPro databases,  
128 respectively, whereas 10,331 (64.28%) and 4,414 (27.46%) genes contained Pfam domains and at  
129 least one transmembrane domain, respectively (Table S10). Notably, 3,465 (21.56%) genes of the  
130 16,072 genes of *B. schroederi* had an ortholog linked to one or more of 134 known biological  
131 pathways (KEGG), and most of these genes can also be mapped to those in *C. elegans* (Table S11).  
132 Moreover, 28 genes were assigned to four groups of antimicrobial effectors, namely, cecropins,  
133 saposins, neuropeptide-like proteins (NLPs) and nematode antimicrobial peptides (AMPs) (Table  
134 S12, File S1).

### 135 **Genome evolution and host shift of ascaridoids**

136 To determine the evolution of ascaridoid parasites in the context of nematodes, we inferred the  
137 phylogeny from 329 single-copy core orthologs across 12 nematode genomes using the maximum  
138 likelihood method (Figure 2A, Figure S6). Based on the phylogeny, the orders Ascaridida, Spirurina  
139 and Rhabditina were each treated as a monophyletic group in the phylum Nematoda, in accordance  
140 with the previously proposed molecular phylogeny [13, 14]. We further focused on the ascaridoid  
141 species in Ascaridida and found that the giant panda *B. schroederi* was more closely related to the  
142 pig *A. suum* and the horse *P. univalens* than to the dog *T. canis*, and these findings supported the  
143 hypothesis that *B. schroederi*, *P. univalens* and *A. suum* belong to the same family (Ascarididae),  
144 whereas *T. canis* belongs to the family Toxocaridae [15-17]. Building on the phylogeny, we  
145 estimated the divergence time of the ascaridoid parasites and other nematodes. Combining the  
146 previously published divergence dates with the fossil record [18-21], we estimated that the species  
147 of Ascaridida and Spirurina separated at 238 Mya and that the species of Ascaridida/Spirurina and  
148 Rhabditina diverged at 365 Mya (Figure 2A, Figure S7). Furthermore, among the order Ascaridida,  
149 the giant panda (*Baylisascaris*) and pig/horse (*Ascaris/Parascaris*) ascaridoids separated at 22 Mya  
150 in the early Miocene period, and the giant panda (*Baylisascaris*) and dog (*Toxocara*) ascaridoids  
151 diverged at 59 Mya in the late Paleocene period. Both of these divergence times appeared to  
152 postdate splits between *Baylisascaris* and *Ascaris/Parascaris* (~70 Mya) and between *Baylisascaris*  
153 and *Toxocara* (~200 Mya), respectively, that were previously estimated based on partial nuclear and  
154 mitochondrial genes [22] but agreed with an earlier speculation in which species of *Ascaris* and  
155 *Caenorhabditis* diverged at ~400 Mya [23].

156 Moreover, an assumed ‘host shift’ theory was developed based on the following results from our  
157 analysis of the divergence times and topological relationships among the four ascaridoid species  
158 and their host animals: (1) the divergence time (59 Mya) of *T. canis* and *B. schroederi* is close to  
159 that of the host dog and giant panda (61 Mya) [24], and the common ancestor of the giant panda  
160 ascaridoid and those of the pig and horse split from the ancestor of the dog ascaridoid following the

161 differentiation of their own hosts; (2) *P. univalens* shared a lower similarity with *T. canis* than with  
162 *B. schroederi* and *A. suum*; (3) the three ascaridoid species (*B. schroederi*, *A. suum* and *P. univalens*)  
163 postdate the differentiation of their own hosts, and the divergence times between the giant panda  
164 and horse and between the pig and horse were 89.6 Mya [24] and 105.7 Mya [25], respectively; (4)  
165 the pig *A. suum* is closer to the horse *P. univalens* than to *B. schroederi*; and (5) the similarity of  
166 orthologous genes between *B. schroederi* and *A. suum* is higher (Wilcoxon signed rank test,  
167  $p < 2.2e-16$ ) than that of orthologous genes between *B. schroederi* and *P. univalens* (Figure S8). We  
168 thus concluded that the common ancestor of the ascaridoids from the giant panda, pig and horse  
169 diverged from the ancestor of the dog ascaridoid as the dog and bear ancestors diverged. The  
170 ancestor of these three ascaridoids first colonized the panda ancestor; subsequently, the pig ancestor  
171 acquired the ascaridoid from panda ancestors via predation or food webs and fixed this parasitism  
172 until formation of its own ascaridoid *A. suum*; and the horse ancestor then acquired the ascaridoid  
173 from pig ancestors and gave rise to the horse ascaridoid *P. univalens* (Figure 2A). Furthermore, our  
174 analysis of the *Ks* distribution of orthologous genes between the four ascaridoid species also  
175 supported the ‘host shift’ assumption because the peak of the *Ks* distribution of orthologous genes  
176 between *B. schroederi* and *A. suum* was significantly skewed from that between *B. schroederi* and *P.*  
177 *univalens* (Figure 2B), which is in contrast to the theoretical observation that *A. suum* and *P.*  
178 *univalens* grouped in one branch and either between *A. suum* and *B. schroederi* or between *P.*  
179 *univalens* and *B. schroederi* should exhibit an overlapping peak in the *Ks* distribution. Furthermore,  
180 the peak value of the *Ks* distribution between *B. schroederi* and *A. suum* was lower than that found  
181 in the *Ks* distribution between *B. schroederi* and *P. univalens*.

182 In addition, based on pairwise comparisons of diverged genes retrieved from orthologous genes  
183 between *B. schroederi*, *A. suum* and *P. univalens*, we found that some diverged genes were shared  
184 among these three ascaridoids (Table S13A). Based on the consideration that host adaptation-related  
185 genes would change before and after host shifts, these shared diverged genes likely provided us  
186 with opportunities to explore gene clues that underline host shifts. Analyses combining GO  
187 enrichment and functional annotations showed that most of the genes were enriched in ion channel  
188 activity (GO:0005216,  $p = 2.60E-05$ ), transporter activity (GO:0005215,  $p = 3.54E-03$ ),  
189 metalloendopeptidase activity (GO:0004222,  $p = 7.71E-03$ ), and transferase activity/transferring  
190 hexosyl groups (GO:0016758,  $p = 2.43E-02$ ) (Figure 2C, Table S13B), which play roles as material  
191 transport-related carriers, including sugar (and other) transporters, transmembrane amino acid  
192 transporter proteins, ABC transporters and ammonium transporter/ion transport proteins, and have  
193 functions in material metabolism, including glycolysis/gluconeogenesis, biosynthesis of amino  
194 acids, amino sugar and nucleotide sugar metabolism, glycerophospholipid metabolism and

195 purine/pyrimidine metabolism (Table S14). These findings at least partly agree with the conclusion  
196 that the host shifts accelerate the divergence of these orthologs among these three ascaridoids to  
197 allow better adaptations to their new nutritional environment due to differences in host feedings. In  
198 addition, several genes, including those that encode immunoglobulins, lectins, flavin-containing  
199 amine oxidoreductases, thioredoxins, serpins and tetraspanins, were predicted to be involved in  
200 host-parasite immune interactions. For instance, flavin-containing amine oxidoreductases might  
201 modulate the levels of host amines (e.g., histamine) and trigger tissue damage in nematode  
202 infections [26, 27]. Tetraspanins bind the Fc domain of immunoglobulin (Ig) G antibodies and  
203 might help the parasites evade host immune recognition and complement activation [26, 28].

#### 204 **Specialized nutrition**

205 The long coevolutionary history between parasitic ascaridoids and their hosts has resulted in the  
206 relatively good tolerance of parasites in the host gut [22, 29, 30]. Food consumed by the giant panda  
207 is almost exclusively composed of bamboo. Thus, to survive in an environment where nutrients are  
208 relatively scarce and simple, *B. schroederi* might strengthen genes related to basal energy  
209 expenditure to meet its own nutrient requirements and the metabolism of major nutrients.

210 Comparative genomic analysis showed that genes that encode transporters were under expansion  
211 and/or positive selection. The ABC transporter (PF00005), sugar (and other) transporter (PF00083),  
212 major facilitator superfamily (PF07690), MFS/sugar transport protein (PF13347), neutral and basic  
213 amino acid transport protein (solute carrier family 3, PF16028), transmembrane amino acid  
214 transporter protein (PF01490), excitatory amino acid transporter (sodium:dicarboxylate symporter  
215 family, PF00375) and long-chain fatty acid transport protein (AMP-binding enzyme, PF00501)  
216 gene families are expanded, and the former two are also identified with positive selection (Figure 3,  
217 Tables S15 and S16), which suggests an increasing ability to transport sugars, amino acids and fatty  
218 acids.

219 In sugar metabolism, increased sugar transport capacity enhances sugar metabolism-related  
220 pathways to provide energy and increase intermediate products to improve the efficiency of  
221 conversion of other nutrients (e.g., amino acids and fatty acids). In the glycolysis/gluconeogenesis  
222 and citrate cycle (TCA cycle), the hexokinase (EC:2.7.1.1) pyruvate dehydrogenase E2 component  
223 (dihydrolipoamide acetyltransferase) (EC:2.3.1.12), citrate synthase (EC:2.3.3.1) and succinyl-CoA  
224 synthetase alpha subunit (EC:6.2.1.4)-related gene families were expanded (Fig. 3 and table S15).  
225 Moreover, the glyceraldehyde 3-phosphate dehydrogenase (EC:1.2.1.12), isocitrate dehydrogenase  
226 (EC:1.1.1.42), succinate dehydrogenase (ubiquinone) iron-sulfur subunit (EC:1.3.5.1), and related  
227 gene families were identified with positive selection (Table S16). Interestingly, the  
228 phosphoglycerate kinase (EC:2.7.2.3)-, pyruvate dehydrogenase E1 component alpha subunit

229 (EC:1.2.4.1)-, and aconitate hydratase (EC:4.2.1.3)-related gene families were both under expansion  
230 and positive selection. These results showed that enhancing the activity of enzymes related to  
231 glucose metabolism promotes the formation of intermediate products and the conversion of other  
232 nutrients.

233 In addition, important enzymes for amino acid and fatty acid biosynthesis were also expanded,  
234 which resulted in the enhancement of their synthesis ability. In the biosynthesis of amino acids, the  
235 glutamate dehydrogenase (NAD(P)<sup>+</sup>) (EC:1.4.1.3)-, D-3-phosphoglycerate  
236 dehydrogenase/2-oxoglutarate reductase (EC:1.1.1.95)-, pyrroline-5-carboxylate reductase  
237 (EC:1.5.1.2)-, branched-chain amino acid aminotransferase (EC:2.6.1.42)-, phosphoglycerate kinase  
238 (EC:2.7.2.3)-, aconitate hydratase (EC:4.2.1.3)- and asparagine synthase (glutamine-hydrolyzing)  
239 (EC:6.3.5.4)-related gene families were expanded (Fig. 3 and table S15). The glyceraldehyde  
240 3-phosphate dehydrogenase (EC:1.2.1.12)- and branched-chain amino acid aminotransferase  
241 (EC:2.6.1.42)-related gene families were under positive selection (Table S16). Interestingly, the  
242 branched-chain amino acid aminotransferase (EC:2.6.1.42)-related gene family was also under  
243 expansion and positive selection. Simultaneously, similar metabolic processes occur in fatty acid  
244 biosynthesis. The long-chain acyl-CoA synthetase (EC:6.2.1.3)-related gene family was expanded,  
245 and the mitochondrial enoyl-(acyl-carrier protein) reductase/trans-2-enoyl-CoA reductase  
246 (EC:1.3.1.38)-related gene family was positively selected (Figure 3, Table S16). All these metabolic  
247 processes indicate that *B. schroederi* can use host nutrients to synthesize nutrients to compensate for  
248 inadequate nutrition in the giant panda gut. The transcriptome analysis showed that these genes are  
249 highly expressed in the intestine of worms, which further proves that the worms replenish nutrition  
250 by enhancing metabolic activities to adapt well to the nutritional environment of the giant panda  
251 gut.

### 252 **Specialized cuticle in *B. schroederi***

253 The nematode cuticle plays a protective role against a variety of external biotic and abiotic stresses  
254 and is composed of five layers, including the surface coat, epicuticle and cortical, medial and basal  
255 layers [31-34]. Although different layers contain distinct molecular assemblies, the cuticle is mainly  
256 formed from collagens, cuticlins, chitin and small amounts of lipids [34-36]. Collagens, which are  
257 the structural proteins in cuticles and comprise the major component of the extracellular matrix, are  
258 synthesized through a multistep process that includes prolyl 4-hydroxylation, procollagen  
259 registration and trimerization, transport from the endoplasmic reticulum, and procollagen  
260 processing and cross-linking, and more than 170 genes are involved in the production of this protein,  
261 similar to the phenomenon in vertebrates [34-38]. In addition, cuticlins, which are another structural  
262 component of the cuticle and are abundant in the outermost cortical layers, are hypothesized to be



263 enzymatically polymerized to constrict the seam cell-derived cuticle and thereby form the  
264 distinctive cuticular alae in *C. elegans* [33, 34, 39].

265 Under this context, we retrieved the genes encoding cuticle collagens from the *B. schroederi* gene  
266 set. We identified 158 gene copies, and each expressed product contained a nematode cuticle  
267 collagen N-terminal domain and/or collagen triple helix repeats (n=20) (Figure 4, Table S17). A  
268 transcriptome analysis showed significantly differential expression of the genes encoding cuticle  
269 collagens during the development of *B. schroederi*, and the genes presented quite high expression  
270 levels at the L5 and adult stages, which indicated that a large number of collagens are needed for  
271 formation of the worm cuticle. Collagen synthesis is catalyzed by prolyl 4-hydroxylase  
272 (EC:1.14.11.2), protein disulfide-isomerase (EC:5.3.4.1) and peptidyl-prolyl cis-trans isomerase A  
273 (EC:5.2.1.8), and this step is followed by cleavage at the N- and C-termini by endoprotease and zinc  
274 metalloproteinase and then maturation and structural cross-linking by dual oxidase (EC:1.6.3.1).  
275 These enzymes, with the exception of zinc metalloproteinase and dual oxidase, are highly  
276 expressed at the L5 and adult stages and contribute to the formation of a thick exoskeleton for body  
277 protection against threats posed by the complex intestinal environment of the host giant panda,  
278 particularly its special bamboo-dominated diet habit. In addition, 32 cuticlins (PF00100, zona  
279 pellucida-like domain) were also identified in *B. schroederi* (Figure 4, Table S17).

280 Interestingly, our speculation was confirmed by histological examinations (Figure 5A, Figure S9,  
281 Table S18), which revealed that the *B. schroederi* cuticle was significantly thickened compared with  
282 those of the other three ascaridoids included in this study, namely, *A. suum*, *P. univalens* and *T.*  
283 *canis* ( $p<0.01$ ). To exclude whether this thickness difference is derived from species variations  
284 among ascaridoids, we also introduced the ursine *Baylisascaris transfuga* for comparisons because  
285 this ascaridoid is congeneric with *B. schroederi* in the genus *Baylisascaris* (Figure S10). Notably, *B.*  
286 *schroederi* has a markedly thicker cuticle than *B. transfuga* ( $p<0.01$ ). We further compared the  
287 cuticle-related genes among *B. schroederi*, *A. suum*, *P. univalens* and *T. canis* (*B. transfuga* was not  
288 included because its genome has not yet been sequenced) and found that cuticle collagens were  
289 duplicated after the separation of *B. schroederi* and *Ascaris/Parascaris* (Figure 5A and C) and that  
290 these genes were highly expressed in *B. schroederi* at the L5 or adult stages (Table S16). A  
291 structural analysis showed that most of these cuticle collagens were present in collinear regions  
292 among these three ascaridoids in the form of tandem repeats with equal sequencing depths (Figure  
293 5D, Figure S11), which suggests the authenticity of gene expansion rather than genome annotation  
294 errors. In addition, peptidyl-prolyl cis-trans isomerases (EC: 5.2.1.8) and cuticle collagens were  
295 positively selected. Such adaptive selections would undoubtedly enhance the functions of these  
296 genes in the cuticle of *B. schroederi*. Combined, these results suggest that through copy-number

297 increases and the functional strengthening of genes involved in cuticle collagen formation, *B.*  
298 *schroederi* has evolved a thicker cuticle as armor to protect itself from the sharp-edged bamboo  
299 culm/branch-enriched intestinal environment during parasitism in the giant panda as it experienced  
300 a significant dietary change from meat to bamboo throughout history.

### 301 **Transcriptomic changes in the life stages**

302 To understand the developmental processes of *B. schroederi*, we profiled genes that were  
303 differentially transcribed among eggs, infective second-stage (L2) larvae, initially  
304 intestine-inhabiting fifth-stage (L5) larvae and adults across the lifecycle (Figure 6, Tables S19 and  
305 S20). We found 14,178 genes that were significantly expressed during at least one stage, and 11,510  
306 genes were differentially expressed among the four life stages. Furthermore, these 11,510 genes  
307 were grouped into expression clusters to uniquely describe each life stage and two life stages, and  
308 expression clusters showing a stepwise increase or decrease in expression corresponding to some  
309 transitions through the lifecycle were also included (Figure S12). The genes that were upregulated  
310 during development from egg to the infectious L2 stage included those involved in the chromatin  
311 assembly, cellular component organization and morphogenesis (Tables S19 and S20), which is in  
312 agreement with the progression from the embryonation to motile and infective larval stage. We  
313 simultaneously noted that the L2 stage was characterized by an increased number of transcribed  
314 genes related to signaling pathways, cell communication, response to stimulus, cellular homeostasis  
315 and molecular binding and/or transport (Tables S19 and S20), which mirrored the larval adaptation  
316 to external conditions and increased the need to detoxify build-up endogenous wastes, consistent  
317 with the results from previous studies in *T. canis* [11, 40]. In addition, the decrease in the  
318 transcription of genes associated with catalytic activity, oxidoreductase activity and electron  
319 transfer activity as well as different metabolic processes, including organic cyclic compound  
320 metabolic process, amino acid metabolic process and lipid metabolic process, observed at the L2  
321 stage (Table S20) also supports the notion that the larvae experience a quiescent state that allows  
322 their adaptation to a reduced metabolic rate in order to survive for extended periods under outside  
323 conditions [41, 42].

324 L5 is the first intestine-inhabiting stage of *B. schroederi*, and its transition from the tissue/organ  
325 migrating larval stage was reflected by a significant upregulation of genes involved in metabolic  
326 processes, oxygen transport and the actin cytoskeleton as well as cuticle development (Table S19).  
327 The genes encoding protein kinases/kinases, peptidases, phosphatases, transferases and hydrolases,  
328 which are possibly associated with food degradation and digestion in *A. suum* and *T. canis* [10, 11],  
329 were also upregulated (Tables S19 and S20). We also noted significantly increased transcription of  
330 genes encoding enzymes related to cell redox homeostasis, including glutathione S-transferase,

331 arylesterase, oxidoreductase and glutathione peroxidase and/or peroxiredoxin, which likely reflects  
332 the maintenance of the redox balance in response to the accumulation of the end products from  
333 anaerobic metabolism and the clearance of reactive oxygen species from endogenous metabolic  
334 activities during infection. In addition, the development process from L5 to adulthood was  
335 characterized by gene sets that were enriched in genes associated with metabolic processes,  
336 hormone mediated growth and development and embryogenesis in adult females (Tables S19 and  
337 S20). For instance, genes involved in amino sugar/carbohydrate metabolisms, insulin-like growth  
338 factor binding, steroid mediated growth and embryonic division were significantly upregulated, and  
339 this upregulation was accompanied by increased expression of genes involved in DNA  
340 replication/repair during this transition.

#### 341 **Insights into new interventions**

342 Because the current excessive use of a small number of drug classes for the treatment of  
343 baylisascariasis in the captive panda population has resulted in the emergence of drug resistance,  
344 the *B. schroederi* genome sequence theoretically provides an alternative approach to drug target  
345 discovery and repurposing [43]. We identified 1,093 essential genes linked to  
346 lethal-gene-knockdown phenotypes in *C. elegans*, and 454 of these were shared with the ChEMBL  
347 database (Table S21). One hundred ninety-four of these 454 genes were deemed one-copy orthologs  
348 and were absent in hosts (Table S21). Thus, we focused on this gene set and gave the highest  
349 priority to genes that are inferred to be highly expressed and to function as enzymatic chokepoints  
350 [42, 44, 45]. Under such strict criteria, druggable candidates, including peptidases (n=3),  
351 serine/threonine kinase (n=1) and protein phosphatases (n=2) (table S21), represent proven targets  
352 of norcantharidin analogs with nematocidal activity [46, 47]. The peptidases were threonine, serine  
353 and metalloenzymes, whereas the protein phosphatases consist of Ser/Thr phosphatases. The  
354 transporters are also validated targets for many current antihelminthics, including imidazothiazole  
355 derivatives (including levamisole), macrocyclic lactones, cyclic depsipeptides and AADs [42,  
356 48-50]. We identified four transporters in the *B. schroederi* genome (Table S21). The combined list  
357 of prioritized targets of drug candidates could prompt the rational design of anthelmintics,  
358 particularly when these targets exert antinematodal effects *in vitro*, as demonstrated through larval  
359 development assays, and *in vivo* in the giant panda.

360 In addition to drug target discovery, vaccine candidates that should be both immunologically  
361 accessible and crucial for parasite survival were also mined from the *B. schroederi* genome.  
362 Excretory/secretory (E/S) proteases and protease inhibitors appear to meet the requirements because  
363 they are secreted into the host, are thus exposed to the host's immune system and can modulate the  
364 immune system of the host to promote parasitism. We surveyed genes encoding E/S proteins (Table

365 S22, File S1), particularly proteases and protease inhibitors, that were expressed during the parasitic  
366 stages of *B. schroederi* and were parasite-specific genes (no orthologs in host mammals). Such  
367 screening yielded 85 proteases, which mainly included protease inhibitors (n=61); among these  
368 vaccine candidates, cysteine peptidases and thioredoxins were expressed at the L5 and adult stages  
369 (Table S23). We also noted the substantial diversity among the cysteine peptidases that contained  
370 cathepsin L and cathepsin W, and most of these, such as cathepsin L, have been under close  
371 scrutiny as vaccine candidates [51, 52]. Moreover, other E/S proteases, including serine peptidases  
372 and serpins that were upregulated at the parasitic stages, have also been observed, although their  
373 feasibility for the development of vaccines remains under evaluation [53, 54]. Therefore, a  
374 combination of genomic data and animal experimentation should advance the screening and  
375 development of vaccines in the future.

## 376 **Discussion**

377 The diet of the giant panda, which is an endangered, herbivorous species, is made up almost  
378 exclusively of low-protein and high-fiber bamboos [1, 55, 56]. This high degree of specialization in  
379 low-quality foods not only shapes the panda's behaviors, allowing it to cope with food challenges  
380 involving the levels and balance of essential nutrients, but also renders the adaptation of its  
381 tract-inhabiting organisms, including parasitic nematodes, to the harsh (sharp-edged bamboo  
382 culm/branch-enriched) intestinal environments of the pandas. The nematode *B. schroederi* is the  
383 only endoparasite that appears to be consistently found in pandas and is the leading cause of death  
384 from primary and secondary infections in wild pandas [4, 5]. Increased lines of evidence show that  
385 *B. schroederi* can grow to a body size comparable to those of other ascaridoid parasites, including *A.*  
386 *suum* in pigs and *P. univalens* in horses [4, 8], which suggests that this parasite has highly evolved  
387 to adapt to its host. Given the long coevolution between parasites and their hosts, it would be  
388 intriguing to explore the speciation of *B. schroederi* and its parasitic adaptation to the unique gut  
389 environment of the panda and to seek alternative measures for the prevention and control of  
390 infections. In this study, we decoded the genome of *B. schroederi* and found molecular clues related  
391 to host shift to illustrate the speciation and molecular evidence of the cuticle thickness and thus  
392 explain gut adaptation. We also characterized the key molecules involved in development or  
393 host-parasite interactions and their potential as intervention targets for *B. schroederi*. These results  
394 provide new insights into the biology and evolution of *B. schroederi* and contribute to the future  
395 development of novel treatments for baylisascariasis in pandas.

396 According to the genome-wide phylogeny, we inferred that among the order Ascaridida, *B.*  
397 *schroederi* is closer to *A. suum* and *P. univalens* than to *T. canis* and that *A. suum* shares the closest

398 relationship with *P. univalens*. Based on the available fossil evidence, we further estimated that the  
399 divergence between *B. schroederi* and *T. canis* occurred markedly earlier than the separation from *A.*  
400 *suum* and *P. univalens* (59 vs 22 Mya). However, a comparative genomics analysis revealed that the  
401 similarity of orthologous genes from *B. schroederi* and *A. suum* is higher than that of orthologous  
402 genes from *B. schroederi* and *P. univalens*, and *P. univalens* shares the lowest similarity to *T. canis*.  
403 Considering morphometric and distribution data of these four ascaridoids as well as the historical  
404 biogeography and phylogeny of their own hosts (i.e., dogs (*T. canis*), pandas (*B. schroederi*), pigs  
405 (*A. suum*) and horses (*P. univalens*)) [15, 16, 22, 24], two host-shifting events likely occurred after  
406 divergence of the common ancestor of ascaridoids between dogs and pandas. In addition, the  
407 occurrence of *A. suum* appears consistent with speciation following a host colonization event from  
408 pandas to pigs apparently from a carnivoran source in sympatry, and the occurrence of *P. univalens*  
409 appears consistent with speciation following a host colonization event from dogs to horses  
410 apparently from predation or food webs. Such history of host colonization is compatible with the  
411 current tree topology and coincides with historical evidence of the spatiotemporal coappearance of  
412 the panda ancestor primal panda *Ailurarctos lufengensis* and the pig ancestor Eurasian wild boar  
413 *Sus scrofa* in the late Miocene and Pliocene and a recent molecular inference of a wide host-shifting  
414 origin for ascaridoid nematodes [22]. Nevertheless, the timing and geographic source for these  
415 ascaridoids cannot be elucidated in detail based on the currently available data and the reduced and  
416 relictual distribution of giant pandas. Future parasitological inventory among a wider host range in a  
417 region of sympatry is necessary to demonstrate that each ascaridoid species has a narrow host range  
418 and might now be limited to the present host [57]. In addition, the apparent differences among the  
419 genomes of *T. canis* in dogs, *B. schroederi* in pandas, *A. suum* in pigs and *P. univalens* in horses,  
420 coupled with their divergent biogeographic and ecological histories, also suggest that this system is  
421 a good model for exploring the complexities of diversification and faunal assembly in the evolution  
422 of the host range and the associations among ascaridoids (e.g., refs. [58-61])

423 In general, the nematode cuticle is an extremely flexible and resilient exoskeleton and plays vital  
424 roles against external stresses. This exoskeleton is composed primarily of cross-linked collagens,  
425 cuticlins, chitin and small amounts of lipids [34-36, 62]. In *B. schroederi*, we observed an  
426 accelerated evolution of genes related to cuticle biosynthesis, including the significantly higher  
427 expression of genes encoding the nematode cuticle collagens, chitin synthase,  
428 DP-N-acetylglucosamine pyrophosphorylase, and peritrophin-A chitin-binding proteins at the adult  
429 stage compared with that at other stages across the development of this parasite, and the significant  
430 expansion of genes such as collagens and peritrophin-A chitin-binding proteins compared with  
431 those in other ascaridoids, namely, *T. canis*, *A. suum* and *P. univalens* [9-11]. This overexpression

432 and expansion of genes responsible for cuticle formation in *B. schroederi* suggest its parasitic  
433 adaptation to the intestinal environment of the panda, which is fully filled with highly fibrous and  
434 sharp-edged components of bamboos. This conclusion is further supported by our analysis of  
435 positive selection, which revealed that genes encoding cuticle collagens, peritrophin-A  
436 chitin-binding proteins, GlcN6P synthase and UDP-N-acetylgalactosamine diphosphorylase are also  
437 positively selected in *B. schroederi* compared with those in *A. suum*, *P. univalens* and *T. canis*. This  
438 molecular evidence, together with morphological and anatomical observations among these  
439 ascaridoid species, including a congeneric *B. transfuga* from bears (Fig. 4), reinforces the  
440 assumption that *B. schroederi* might have evolved a thicker cuticle as an armor to protect itself from  
441 the harsh external environment during its gut parasitism in pandas. Because the panda retains the  
442 alimentary tract of bears but evolved into a bamboo-eating herbivore, unlike other members of  
443 Ursidae, which are carnivores or omnivores, further studies that include the bear *B. transfuga* for  
444 genome comparison might be needed to illustrate the significantly thickened cuticle that is only  
445 present in the panda *B. schroederi*.

446 In this study, we present a chromosome-level genome assembly of the giant panda roundworm *B.*  
447 *schroederi* and uncover an evolutionary trajectory accompanied by host-shift events in ascaridoid  
448 parasite lineages after host separations and an increased cuticle thickness and efficient utilization of  
449 host nutrients in *B. schroederi*, which guarantee its gut parasitism in giant pandas. We also found a  
450 broad range of key classes of molecules involved to host-parasite interplay and immunoregulation  
451 that could serve as potentially ideal targets by developing new and urgently needed interventions  
452 (drugs, vaccines and diagnostic methods) for the control of baylisascariasis. These genome  
453 resources not only enable the transition from ‘single-molecule’ research to global molecular  
454 discovery in *B. schroederi* but should also contribute to the protection of giant pandas by providing  
455 a novel treatment for baylisascariasis.

## 456 **Materials and methods**

### 457 **Samples and preparations**

458 Adult worms of *B. schroederi* were collected from naturally infected giant pandas at Chengdu  
459 Research Base of Giant Panda Breeding, Chengdu (Sichuan, China). Embryonated eggs were  
460 obtained 2 cm proximal to the uteri of the females. The second-stage larvae (L2s) were harvested  
461 using established *in vitro* *B. schroederi* egg culture protocols. Briefly, after filtering through a  
462 100- $\mu$ m nylon sieve filter, washing with PBS, and centrifugation, the egg suspension obtained from  
463 the uteri was placed into 100-mm culture dishes and maintained at ambient room temperature for at  
464 least 60 days to embryonate the eggs to an infective L2 stage. The eggs with well-formed and

465 ensheathed larvae in the suspension were counted, and the suspension was then stored at 4 °C until  
466 use. L5s (n=25) were occasionally isolated from naturally infected captive giant pandas at the  
467 Chengdu Research Base of Giant Panda Breeding. These larvae together with adult worms were  
468 washed extensively in sterile physiological saline (37 °C), snap-frozen in liquid nitrogen and then  
469 stored at -80 °C until use. All the samples of other ascaridoid specimens, including *B. transfuga*, *A.*  
470 *suum*, *Parascaris univalens* and *T. canis*, were also derived from naturally infected polar bears, pigs,  
471 horses and dogs, respectively, and provided by the Department of Parasitology, College of  
472 Veterinary Medicine, Sichuan Agricultural University.

473 Genomic DNA was extracted from the freshly collected middle portion of *B. schroederi* to  
474 construct one paired-end library and one SMRT library. Messenger RNA was isolated from *B.*  
475 *schroederi* embryonated eggs, L2s, L5s and adult females for the construction of paired-end cDNA  
476 libraries (300 bp). To further verify the identity of the specimen, the ITS1 and ITS2 sequences of  
477 nuclear ribosomal DNA (rDNA) were amplified by PCR and compared with those previously  
478 reported for *B. schroederi* (Accession number: JN210912) [63].

#### 479 **Genome survey analysis**

480 To survey the characterization of the *B. schroederi* genome, a 300-bp pair-end library was  
481 constructed, and a total of ~10-Gb next-generation sequencing data were generated using the  
482 Illumina sequencing platform (HiSeq4000) (Table S1). Adaptor sequences, PCR duplicates and  
483 low-quality sequences were removed from the raw data to generate high-quality sequences. K-mer  
484 (17) statistics of the high-quality sequences were calculated by Jellyfish (version 2.1.3) [64] with  
485 “-C -m 17”. GenomeScope (version 2.0) [65] software was used to estimate the size, heterozygosity  
486 and repeat content of the *B. schroederi* genome (Figure S13).

#### 487 **Genome sequencing and assembly**

488 One cell run of single-molecule long reads was generated with the PacBio Sequel II platform (table  
489 S1). A total of 189-Gb long subreads (97,400,959,204 bases, ~332× based on the estimated genome  
490 size) were generated and *de novo* assembled using CANU (version 1.8) [66]. The parameters were  
491 optimized for heterozygotic genomes according to the authors’ documentation. The initial CANU  
492 assembly was corrected using a combination of long and short reads using Pilon (version 1.23) [67]  
493 with the default parameters. Duplicated assembled haploid contigs were purged using Purge  
494 Haplotigs (version 1.1.1) [68], which reduced the assembly from 559 Mb to 299 Mb. A Hi-C library  
495 was constructed with *HindIII* as the digestion enzyme and sequenced in two batches with the  
496 Illumina HiSeq4000 and NovaSeq platforms. The purged contigs were anchored into superscaffolds  
497 using the Juicer and 3d-dna pipelines. The generated assembly files were visualized and manually

498 optimized using the built-in assembly tool (JBAT) of Juicebox. Twenty-one pseudomolecules were  
499 preliminarily generated with the 3d-dna pipeline. After breaking weak or ambiguous contact links  
500 between large TAD blocks and rebuilding the boundaries, a total of 27 pseudomolecules were  
501 generated. Note that these pseudomolecules did not represent complete chromosomes, and  
502 downstream synteny analysis with the *A. suum* genome showed that at least six molecules were  
503 likely partial chromosomes, which might reduce the number from 27 to 24. However, due to the  
504 lack of direct evidence of the karyotype of *B. schroederi*, we did not modify the result. Finally, the  
505 genome assembly contains 27 chromosome-level pseudomolecules and 123 unplaced scaffolds. The  
506 completeness of the assembly was assessed through Benchmarking Universal Single-copy  
507 Orthologs (BUSCO) analysis (Version 3.0.2, lineage dataset: nematoda\_odb9) [69] and using  
508 RNA-seq data.

### 509 **Identification of repeat elements and noncoding RNAs**

510 RepeatMasker (version 4.0.5, <http://www.repeatmasker.org/>) with the default parameters was  
511 applied to identify the dispersed repeats and tandem repeats. The species-specific repeat library was  
512 constructed with RepeatModeler (version 1.0.5, <http://www.repeatmasker.org/>). Using this library,  
513 repetitive sequences were further annotated and classified with RepeatMasker  
514 (<http://www.repeatmasker.org/>). The tRNA genes were predicted by tRNAscan-SE (version 1.3.1)  
515 [70] with general eukaryote parameters. The programs RNAmmer (version 1.2) and rfam\_scan.pl  
516 (version 1.2) [71] were used to predict the large ribosomal subunit (LSU) and small ribosomal  
517 subunit (SSU) rRNA genes, respectively.

### 518 **Gene annotation**

519 Protein-coding genes were annotated using a combination of *ab initio* gene prediction,  
520 homology-based gene prediction and transcriptome-based prediction. A total of 12 RNA-seq  
521 libraries were used to construct the transcripts by applying the HISAT2 (version 2.1.0) and  
522 StringTie (version 1.3.4) pipelines [72]. All constructed transcripts were combined using TACO  
523 (version 0.7.3) [73]. The ORFs on the transcripts were extracted with TransDecoder (version 5.5.0)  
524 [74]. The complete CDS from the TransDecoder result was used as the training set for *ab initio*  
525 prediction, which was performed with the BRAKER2 pipeline (version 2.1.5) [75]. All protein  
526 sequences of the previously sequenced nematode genomes were mapped to the genome using  
527 GenomeThreader (version 1.7.1) [76]. EVIDENCEModeler (version 1.1.1) [77] was employed to  
528 integrate the results from the three prediction methods and thus generate a consensus gene set, and  
529 the resulting set was further curated by removing frameshift and redundancy using the GFFRead  
530 (version 0.11.6) [78] tool from Cufflinks. Gene function annotation was performed using BLASTP  
531 (-evalue 1e-3) with public databases such as the nonredundant protein database (Nr) [79] and the



532 KEGG database [80, 81]. InterproScan [82] was used to identify domains of the predicted proteins,  
533 assign GO terms to the predicted genes and classify the functional annotations.

### 534 **Gene family analysis**

535 Protein sequences from *B. schroederi* and 11 other nematodes (*A. suum*, *P. univalens*, *T. canis*, *Loa*  
536 *loa*, *B. malayi*, *H. bacteriophora*, *H. contortus*, *P. pacificus*, *C. elegans*, *M. hapla* and *T. spiralis*)  
537 were used to analyze the gene family. Proteins with a length shorter than 30 aa or a frame shift were  
538 removed from the protein set, and the program OrthoFinder (version 2.3.3) [83] with the default  
539 parameters was used to construct the gene families and infer orthologous and paralogous genes.  
540 CAFE (version 3.0) [84] was utilized to identify the gene families that underwent expansion or  
541 contraction using the ultrametric tree inferred by BEAST2 and the estimated birth-death parameter  
542  $\lambda$ .

### 543 **Homolog comparison**

544 An all-to-all BLASTP (-evalue 1e-3 -outfmt 6) analysis of the proteins was performed to calculate  
545 the pairwise similarities. The  $K_s$  values of orthologous genes were calculated using codeml with the  
546 setting “runmodel = -2, CodonFreq = 2, model = 0, NSsites = 0”.

547 To compare the similarities among Ascarididae species at the gene level, a similarity analysis of  
548 orthologous genes was performed with the following steps:

- 549 (1) *A. suum* and *P. univalens* were selected as the query species to analyze which species is more  
550 similar to the target species *B. schroederi*; *B. schroederi*, *A. suum* and *P. univalens* were selected as  
551 the query species to analyze which species is more similar to the target species *T. canis*;
- 552 (2) The best-match orthologous genes of the target and query species were obtained from MCSan  
553 blocks;
- 554 (3) The similarity index (SI) was calculated using the formula  $SI=S/L$ , where S represents the  
555 alignment score of a pair of proteins and L represents the target protein length;
- 556 (4) Based on the SI value, the Wilcoxon signed rank test was used to analyze whether the similarity  
557 between different query species and target species was significantly different ( $p \leq 0.05$ , one-sided).

### 558 **Phylogeny construction**

559 A total of 329 single-copy gene families were obtained, and the corresponding protein sequences  
560 were extracted. Individual protein alignment for each gene family was performed using Clustal  
561 Omega (version 1.2.1) [85] with the default settings, and gaps in the alignments were removed  
562 using the program trimAl (version 1.4) [86]. The alignments with a length of at least 100 aa were  
563 concatenated with a Perl script. The best amino acid substitution model for the protein alignment  
564 was estimated by ProtTest (version 3.4.2) [87] with the parameter “-IG -F -AIC -BIC -S 2

565 -all-distributions -tc 0.5". The maximum likelihood tree was constructed using RAxML (version  
566 8.0.24) [88] with the following parameters: 1) bootstrapping replicates, 200; 2) substitution model,  
567 LG+I+G+F; and 3) outgroup, *T. spiralis*.

### 568 **Divergence time estimations**

569 The divergence time was estimated from the protein alignment by BEAST2 (version 2.5) [89] with  
570 the following parameters: 1) site Model, WAG+I+G+F; 2) clock model, relaxed clock log normal; 3)  
571 priors, calibrated Yule model; 4) time calibration: the split time (382-532 Mya) of Chromadorea  
572 and Enoplea [18], the split time (280-430 Mya) of *Pristionchus* and *Caenorhabditis* [19] and two  
573 fossil times (~396 and 240 Mya) for Enoplia [20] and Ascaridoidea [21], respectively; 5) chain  
574 length per MCMC run, 10,000,000. A consistent tree with divergence times was inferred by  
575 TreeAnnotator with a maximum clade credibility method and displayed using FigTree  
576 (<https://github.com/rambaut/figtree/releases>).

### 577 **Identification of positively selected genes**

578 Orthologous genes of the four Ascarididae species (*B. schroederi*, *A. suum*, *P. univalens* and *T.*  
579 *canis*) were extracted from the OrthoFinder results to identify positively selected genes (PSGs).  
580 Multiple protein sequence alignments were performed with Clustal Omega and converted to  
581 corresponding CDS alignments using an in-house Perl script. Gaps in the CDS alignments were  
582 removed with the program trimAl. The Codeml program with modified branch-site model A (model  
583 = 2, NSsites = 2) as implemented in the PAML package (version 4.9) [90] was used to identify  
584 PSGs. The alternative hypothesis with estimated  $\omega_2$  (fix\_omega=0 and initial omega=1.5) and the  
585 corresponding null model with fixed  $\omega_2=1$  (fix\_omega=1 and omega=1) for the lineage *B.*  
586 *schroederi* (foreground branch) were used to calculate the omega values and log likelihood values,  
587 respectively. The likelihood ratio test (LRT) for selection of the lineage of *B. schroederi* was  
588 performed based on the likelihood values obtained from the two models. Genes with  $p \leq 0.05$  were  
589 PSGs.

### 590 **Transcriptome analysis**

591 Adaptor sequences, contaminants and low-quality sequences were removed from the raw RNA-seq  
592 data. RSEM (version 1.1.17) [91] with the default parameters was used to map the high-quality  
593 reads to the transcripts and calculate the expression levels (transcripts per million (TPM) and read  
594 count) of the protein-coding genes. Three replicates of each stage were used to reduce sampling bias.  
595 Differentially expressed genes among different developmental stages were detected with edgeR  
596 (version 3.30.3, the false discovery rate (FDR)  $\leq 0.05$ ) [92] from the R package (version 3.6.1)  
597 using the read counts of the genes. Clustering of the gene expression time-course data from the four

598 stages of *B. schroederi* was performed with Mfuzz (version 2.48.0) [93].

### 599 **Gene Ontology enrichment analysis**

600 The tool BiNGO (Version 3.0.4) [94] implemented in Cytoscape (version 3.7.1) [95] software was  
601 used to analyze the GO enrichment of the genes from expanded gene families or differentially  
602 expressed genes with a hypergeometric test. The GO annotation profile of *B. schroederi* was  
603 constructed with an in-house Perl script, and the ontology file was obtained from the Gene  
604 Ontology web (<http://geneontology.org/>). GO terms with p-values $\leq$ 0.05 calculated by  
605 hypergeometric test were extracted for functional analysis.

### 606 **Histological processing and analysis**

607 The ascaridiod adults were fixed in formalin and routinely processed for histology as described  
608 elsewhere [7]. Briefly, fresh adults of *B. schroederi* (n=6), *A. suum* (n=8), *P. univalens* (n=8) and *T.*  
609 *canis* (n=8) as well as ursine *B. transfuga* (n=6) were fixed in 10% neutral phosphate-buffered  
610 formalin for 24 h. The portion (~1.5 cm) of the middle body of each fixed worm was then cut,  
611 oriented transversally and inserted into biopsy cassettes. All samples were washed in tap water and  
612 dehydrated by serial dilutions of alcohol (methyl, ethyl and absolute ethyl). Paraffin embedding was  
613 performed with a Leica Tissue Processing station using a 12-h protocol. Paraffin blocks were  
614 prepared using a Leica inclusion station. Afterward, each block was cut into 3- $\mu$ m tissue sections  
615 using a Leica microtome. Each slide was stained with hematoxylin and eosin (HE). For each worm,  
616 three slides were examined under an inverted light microscope (Olympus FSX100, Olympus  
617 Corporation, Japan), and the cuticle thickness of these five ascaridiod species were then measured  
618 and compared. The data were expressed as the means  $\pm$  standard deviations (SD). Comparisons  
619 between ascaridoid species were performed by one-way ANOVA, LSD and Scheffe's test using  
620 SPSS (IBM SPSS Statistics for Windows, version 20; Armonk, NY: IBM Corp., USA). p values  $<$   
621 0.01 were considered to be significant.

### 622 **Identification of potential drug targets and vaccine candidates**

623 All *B. schroederi* proteins were searched against lethal genes (WormBase WS226:  
624 WBPhenotype:0000050, WBPhenotype:0000054, WBPhenotype:0000060 and  
625 WBPhenotype:0000062 and subphenotypes), the ChEMBL database  
626 (<https://www.ebi.ac.uk/chembl/>) and host proteins (<http://panda.genomics.org.cn/download.jsp>)  
627 using BLASTP ( $E\leq 1\times 10^{-10}$ ). Genes with alignment length ratios and similarities higher than 0.5  
628 were selected. The genes that are homologous to the lethal gene and ChEMBL database were then  
629 selected, the genes that are homologous to the host were removed, and single-copy genes were

630 further screened. The following formula was used to assign a score to each potential drug target  
631 gene:

$$632 S_{\text{target}} = (S_I + S_c) * 2 + S_t + S_e$$

$$633 S_t = \log(\max(T_{L5}, T_{\text{adult}})) / \log(10)$$

634  $S_I$  and  $S_c$  are the SI values of genes homologous to the lethal gene and ChEMBL database,  
635 respectively, and  $T_{L5}$  and  $T_{\text{adult}}$  represent the gene expression (TPM) at the L5 and adult stages,  
636 respectively.  $S_e$  equals 1 if the target gene encodes a protease, protein kinase, protein phosphorylase,  
637 transporter or ion channel; otherwise,  $S_e$  is 0.

638 All proteins with signal peptides and one transmembrane structure domain were identified as E/S  
639 proteins. Proteases and protease inhibitors without host homology and  $\text{TPM} \geq 1$  were screened from  
640 secretory proteins as vaccine candidates.

## 641 **Data Availability**

642 All raw sequencing data (including the genome, transcriptome and Hi-C data) described in this  
643 manuscript have been deposited in the Sequence Read Archive (SRA) database under the accession  
644 codes PRJNA666314.

## 645 **Ethical statement**

646 This study was approved by the Animal Ethics Committee of Sichuan Agricultural University  
647 (Sichuan, China; approval no. SYXK 2014-187) and the Wildlife Management and Animal Welfare  
648 Committee of China, and all procedures involving animals in the present study were in strict  
649 accordance with the Guide for the Care and Use of Laboratory Animals (National Research  
650 Council, Bethesda, MD, USA) and the recommendations in the ARRIVE guidelines (<https://www.nc3rs.org.uk/arrive-guidelines>).

## 652 **CRedit author statement**

653 **Yue Xie:** Investigation, Formal analysis, Funding acquisition, Writing - original draft, Writing -  
654 review & editing. **Sen Wang:** Methodology, Formal analysis, Data Curation, Visualization,  
655 Software, Writing - original draft. **Shuangyang Wu:** Methodology, Formal analysis, Visualization,  
656 Writing - original draft. **Shenghan Gao:** Methodology, Formal analysis, Funding acquisition,  
657 Writing - review & editing. **Qingshu Meng:** Formal analysis, Writing - review & editing.  
658 **Chengdong Wang:** Resources. **Jingchao Lan:** Formal analysis. **Li Luo:** Resources. **Xuan Zhou:**  
659 Investigation. **Jing Xu:** Formal analysis. **Xiaobin Gu:** Resources. **Ran He:** Investigation. **Zijiang**

660 **Yang:** Formal analysis. **Xuerong Peng:** Resources. **Songnian Hu:** Conceptualization, Supervision,  
661 Resources, Writing - review & editing. **Guangyou Yang:** Conceptualization, Supervision,  
662 Resources, Funding acquisition, Writing - review & editing. All authors read and approved the final  
663 manuscript.

#### 664 **Competing interests**

665 The authors have declared no competing interests.

#### 666 **Acknowledgments**

667 This research was partially supported by the Chengdu Giant Panda Breeding Research Foundation  
668 (Grant No. CPF-2012-13), Self-supporting Project of Chengdu Giant Panda Breeding Research  
669 Base (Grant No. 2020CPB-B20), Sichuan International Science and Technology Innovation  
670 Cooperation/Hong Kong, Macao and Taiwan Science and Technology Innovation Cooperation  
671 Project, China (Grant No. 2019YFH0065), Natural Science Foundation of China, Young Scientists  
672 Fund (Grant No. 31801048), and the High-level Scientific Research Foundation for the Introduction  
673 of Talents of Sichuan Agricultural University of China (Grant No. 03120322). The funders had no  
674 role in design, decision to publish, or preparation of the manuscript.

#### 675 **ORCID**

676 0000-0001-9062-6928 (Yue Xie)  
677 0000-0002-3497-3068 (Sen Wang)  
678 0000-0001-6305-3204 (Shuangyang Wu)  
679 0000-0003-4280-4915 (Shenghan Gao)  
680 0000-0001-8093-7482 (Qingshu Meng)  
681 0000-0003-1866-3307 (Chengdong Wang)  
682 0000-0001-7217-1798 (Jingchao Lan)  
683 0000-0003-2087-3063 (Li Luo)  
684 0000-0002-0191-6606 (Xuan Zhou)  
685 0000-0003-3773-7973 (Jing Xu)  
686 0000-0003-4540-2102 (Xiaobin Gu)  
687 0000-0003-0203-0337 (Ran He)  
688 0000-0003-2221-0052 (Zijiang Yang)  
689 0000-0003-4017-4171 (Xuerong Peng)  
690 0000-0003-3966-3111 (Songnian Hu)  
691 0000-0001-7309-4499 (Guangyou Yang)

## 692 References

- 693 [1] Wei F, Hu Y, Yan L, Nie Y, Wu Q, Zhang Z. Giant pandas are not an evolutionary cul-de-sac: evidence from  
694 multidisciplinary research. *Mol Biol Evo.* 2015;32:4-12.
- 695 [2] Nie Y, Speakman JR, Wu Q, Zhang C, Hu Y, Xia M, et al. Exceptionally low daily energy expenditure in the  
696 bamboo-eating giant panda. *Science* 2015;349:171-4.
- 697 [3] Edwards MS, Zhang G, Wei R, Liu X. *Giant Pandas Biology, Veterinary Medicine and Management.*  
698 Cambridge: Cambridge University Press; 2006.
- 699 [4] Loeffler K, Montali RJ, Rideout BA. Diseases and Pathology of Giant Pandas. In: Edwards MS, Zhang G, Wei  
700 R, Liu X, editors. *Giant Pandas Biology, Veterinary Medicine and Management.* Cambridge: Cambridge  
701 University Press; 2006. p. 377-409.
- 702 [5] Zhang JS, Daszak P, Huang HL, Yang GY, Kilpatrick AM, Zhang S. Parasite threat to panda conservation.  
703 *Ecohealth* 2008;5:6-9.
- 704 [6] Xie Y, Zhou X, Zhang Z, Wang C, Sun Y, Liu T, et al. Absence of genetic structure in *Baylisascaris*  
705 *schroederi* populations, a giant panda parasite, determined by mitochondrial sequencing. *Parasit Vectors*  
706 2014;7:606.
- 707 [7] Xie Y, Chen S, Yan Y, Zhang Z, Li D, Yu H, et al. Potential of recombinant inorganic pyrophosphatase  
708 antigen as a new vaccine candidate against *Baylisascaris schroederi* in mice. *Vet Res.* 2013;44:90.
- 709 [8] Yang GY, Zhang Z. *Parasitic Diseases of Wildlife.* Beijing: Science Press; 2013.
- 710 [9] Wang J, Gao S, Mostovoy Y, Kang Y, Zagoskin M, Sun Y, et al. Comparative genome analysis of  
711 programmed DNA elimination in nematodes. *Genome Res* 2017;27:2001-14.
- 712 [10] Jex AR, Liu S, Li B, Young ND, Hall RS, Li Y, et al. *Ascaris suum* draft genome. *Nature* 2011;479:529-33.
- 713 [11] Zhu XQ, Korhonen PK, Cai H, Young ND, Nejsun P, von Samson-Himmelstjerna G, et al. Genetic blueprint  
714 of the zoonotic pathogen *Toxocara canis*. *Nat Commun* 2015;6:6145.
- 715 [12] Simão FA, Waterhouse RM, Ioannidis P, Kriventseva EV, Zdobnov EM. BUSCO: assessing genome  
716 assembly and annotation completeness with single-copy orthologs. *Bioinformatics* 2015;31:3210-2.
- 717 [13] Jex AR, Waeschenbach A, Hu M, van Wyk JA, Beveridge I, Littlewood DT, et al. The mitochondrial  
718 genomes of *Ancylostoma caninum* and *Bunostomum phlebotomum* - two hookworms of animal health and  
719 zoonotic importance. *BMC Genomics* 2009;10:79.
- 720 [14] Xie Y, Zhang Z, Wang C, Lan J, Li Y, Chen Z, et al. Complete mitochondrial genomes of *Baylisascaris*  
721 *schroederi*, *Baylisascaris ailuri* and *Baylisascaris transfuga* from giant panda, red panda and polar bear.  
722 *Gene* 2011;482:59-67.
- 723 [15] Sprent JF. Notes on *Ascaris* and *Toxascaris*, with a definition of *Baylisascaris* gen.nov. *Parasitology*  
724 1968;58:185-98.
- 725 [16] Hartwich G. Keys to Genera of the Ascaridoidea. In: Anderson RC, Chabaud AG and Willmott S, editors.  
726 *CIH Keys to the Nematode Parasites of Vertebrates*, Farnham Royal: Commonwealth Agricultural Bureaux;  
727 1974, p. 1-14.
- 728 [17] Nadler SA, Hudspeth DS. Ribosomal DNA and phylogeny of the Ascaridoidea (Nemata: Secernentea):  
729 implications for morphological evolution and classification. *Mol Phylogenet Evol* 1998;10:221-36.
- 730 [18] Rota-Stabelli O, Daley AC, Pisani D. Molecular timetrees reveal a Cambrian colonization of land and a new  
731 scenario for ecdysozoan evolution. *Curr Biol* 2013;23:392-8.

- 732 [19] Dieterich C, Clifton SW, Schuster LN, Chinwalla A, Delehaunty K, Dinkelacker I, et al. The *Pristionchus*  
733 *pacificus* genome provides a unique perspective on nematode lifestyle and parasitism. *Nat Genet*  
734 2008;40:1193-8.
- 735 [20] Poinar G, Hass H, Kerp H. *Palaeonema phyticum* gen. n., sp. n. (Nematoda: Palaeonematidae fam. n.), a  
736 Devonian nematode associated with early land plants. *Nematology* 2008;10:9-14.
- 737 [21] Silva PA, Borba VH, Dutra JM, Leles D, da-Rosa AA, Ferreira LF, et al. A new ascarid species in cynodont  
738 coprolite dated of 240 million years. *An Acad Bras Cienc* 2014;86:265-9.
- 739 [22] Li L, Lü L, Nadler SA, Gibson DI, Zhang LP, Chen HX, et al. Molecular phylogeny and dating reveal a  
740 terrestrial origin in the early carboniferous for ascaridoid nematodes. *Syst Biol* 2018;67:888-900.
- 741 [23] Blaxter M. Nematodes (Nematoda). In: Morrison DA, editor. *The Timetree of Life*, Oxford: Oxford  
742 University Press; 2009, p. 247-50.
- 743 [24] Nyakatura K, Bininda-Emonds OR. Updating the evolutionary history of Carnivora (Mammalia): a new  
744 species-level supertree complete with divergence time estimates. *BMC Biol* 2012;10:12.
- 745 [25] Dos Reis M, Inoue J, Hasegawa M, Asher RJ, Donoghue PC, Yang Z. Phylogenomic datasets provide both  
746 precision and accuracy in estimating the timescale of placental mammal phylogeny. *Proc Biol Sci*  
747 2012;279:3491-500.
- 748 [26] International Helminth Genomes Consortium. Comparative genomics of the major parasitic worms. *Nat*  
749 *Genet* 2019;51:163-74.
- 750 [27] Smolinska S, Jutel M, Cramer R, O'Mahony L. Histamine and gut mucosal immune regulation. *Allergy*  
751 2014;69:273-81.
- 752 [28] Wu C, Cai P, Chang Q, Hao L, Peng S, Sun X, et al. Mapping the binding between the tetraspanin molecule  
753 (Sjc23) of *Schistosoma japonicum* and human non-immune IgG. *PLoS ONE* 2011;6:e19112.
- 754 [29] Allen JE, Maizels RM. Diversity and dialogue in immunity to helminths. *Nat Rev Immunol* 2011;11:375-88.
- 755 [30] Hu Y, Yu L, Fan H, Huang G, Wu Q, Nie Y, et al. Genomic signatures of coevolution between non-model  
756 mammals and parasitic roundworms. *Mol Biol Evol* 2020. <https://doi.org/10.1093/molbev/msaa243>.
- 757 [31] Cox GN, Kusch M, Edgar RS. Cuticle of *Caenorhabditis elegans*: its isolation and partial characterization. *J*  
758 *Cell Biol* 1981;90:7-17.
- 759 [32] Cox GN, Staprans S, Edgar RS. The cuticle of *Caenorhabditis elegans*: II. Stage-specific changes in  
760 ultrastructure and protein composition during postembryonic development. *Dev Biol* 1981;86:456-70.
- 761 [33] Bird AF, Bird J. *The Structure of Nematodes*. San Diego: Academic Press; 1991.
- 762 [34] Page AP, Johnstone IL. The cuticle. *WormBook* 2007;1:1-15.
- 763 [35] Liu Z, Kirch S, Ambros V. The *Caenorhabditis elegans* heterochronic gene pathway controls stage-specific  
764 transcription of collagen genes. *Development* 1995;121:2471-8.
- 765 [36] Thein MC, McCormack G, Winter AD, Johnstone IL, Shoemaker CB, Page AP. *Caenorhabditis elegans*  
766 exoskeleton collagen COL-19: An adult-specific marker for collagen modification and assembly, and the  
767 analysis of organismal morphology. *Dev Dyn* 2003;226:523-9.
- 768 [37] Prockop DJ, Kivirikko KI. Collagens: molecular biology, diseases, and potentials for therapy. *Annu Rev*  
769 *Biochem* 1995;64:403-34.
- 770 [38] Myllyharju J, Kivirikko KI. Collagens, modifying enzymes and their mutations in humans, flies and worms.  
771 *Trends Genet* 2004;20:33-43.
- 772 [39] Lewis E, Lewis M, Sebastiano M, Nola F, Zei F, Lassandro F, et al. Cuticulin genes of nematodes. *Parasite*

- 773 1994;1:57-8.
- 774 [40] Zheng WB, Zou Y, Zhu XQ, Liu GH. *Toxocara* "omics" and the promises it holds for medicine and  
775 veterinary medicine. *Adv Parasitol* 2020;109:89-108.
- 776 [41] Schwarz EM, Hu Y, Antoshechkin I, Miller MM, Sternberg PW, Aroian RV. The genome and transcriptome  
777 of the zoonotic hookworm *Ancylostoma ceylanicum* identify infection-specific gene families. *Nat Genet*  
778 2015;47:416-22.
- 779 [42] Schwarz EM, Korhonen PK, Campbell BE, Young ND, Jex AR, Jabbar A, et al. The genome and  
780 developmental transcriptome of the strongylid nematode *Haemonchus contortus*. *Genome Biol* 2013;14:R89.
- 781 [43] Shanmugam D, Ralph SA, Carmona SJ, Crowther GJ, Agüero F. Integrating and Mining Helminth Genomes  
782 to Discover and Prioritize Novel Therapeutic Targets. In: Caffrey CR, editor. *Parasitic Helminths: Targets,*  
783 *Scceens, Drugs and Vaccines*, Weinheim: Wiley-VCH Verlag GmbH & Co. KGaA; 2012, p. 43-5.
- 784 [44] Yeh I, Hanekamp T, Tsoka S, Karp PD, Altman RB. Computational analysis of *Plasmodium falciparum*  
785 metabolism: organizing genomic information to facilitate drug discovery. *Genome Res* 2004;14:917-24.
- 786 [45] Berriman M, Haas BJ, LoVerde PT, Wilson RA, Dillon GP, Cerqueira GC, et al. The genome of the blood  
787 fluke *Schistosoma mansoni*. *Nature* 2009;460:352-8.
- 788 [46] Campbell BE. Norcantharidin analogues with nematocidal activity in *Haemonchus contortus*. *Bioorg Med*  
789 *Chem Lett* 2011;21:3277-81.
- 790 [47] Deng L, Tang S. Norcantharidin analogues: a patent review (2006-2010). *Expert Opin Ther Pat*  
791 2011;21:1743-53.
- 792 [48] Kaminsky R, Ducray P, Jung M, Clover R, Rufener L, Bouvier J, et al. A new class of anthelmintics effective  
793 against drug-resistant nematodes. *Nature* 2008;452:176-80.
- 794 [49] Campbell WC, Fisher MH, Stapley EO, Albers-Schönberg G, Jacob TA. Ivermectin: a potent new  
795 antiparasitic agent. *Science* 1983;221:823-8.
- 796 [50] Qian H, Robertson AP, Powell-Coffman JA, Martin RJ. Levamisole resistance resolved at the single-channel  
797 level in *Caenorhabditis elegans*. *FASEB J* 2008;22:3247-54.
- 798 [51] Dalton JP, Mulcahy G. Parasite vaccines-a reality? *Vet Parasitol* 2001;98:149-67.
- 799 [52] Mulcahy G, Dalton JP. Cathepsin L proteinases as vaccines against infection with *Fasciola hepatica* (liver  
800 fluke) in ruminants. *Res Vet Sci* 2001;70:83-6.
- 801 [53] Yang Y, Wen Yj, Cai YN, Vallée I, Boireau P, Liu MY, et al. Serine Proteases of parasitic helminths. *Korean*  
802 *J Parasitol* 2015;53,1-11.
- 803 [54] Zang X, Maizels RM. Serine proteinase inhibitors from nematodes and the arms race between host and  
804 pathogen. *Trends Biochem Sci* 2001;26:191-7.
- 805 [55] Wei F, Hu Y, Zhu L, Bruford MW, Zhan X, Zhang L. et al. Black and white and read all over: the past,  
806 present and future of giant panda genetics. *Mol Eco* 2012;21:5660-74.
- 807 [56] Zhao S, Zheng P, Dong S, Zhan X, Wu Q, Guo X. et al. Whole-genome sequencing of giant pandas provides  
808 insights into demographic history and local adaptation. *Nat Genet* 2013;45:67-71.
- 809 [57] Brooks DR, Hoberg E P, Boeger WA, Gardner SL, Galbreath KE, Herczeg D, et al. Finding them before they  
810 find us: informatics, parasites, and environments in accelerating climate change. *Comp Parasitol*  
811 2014;81:155-64.
- 812 [58] Hoberg EP, Brooks DR. A macroevolutionary mosaic: episodic host-switching, geographical colonization  
813 and diversification in complex host-parasite systems. *J Biogeogr* 2008;35:1533-50.



- 814 [59] Hoberg EP. BDBvitp, Ecological Fitting and Oscillation in Historical Biogeography and Evolution. In:  
815 Lafferty KD, Torchin ME, Kuris AM, editors. *The Geography of Host-Parasite Interactions*, Oxford: Oxford  
816 University Press; 2010, p. 7-20.
- 817 [60] Hoberg EP, Brooks DR. Evolution in action: climate change, biodiversity dynamics and emerging infectious  
818 disease. *Philos Trans R Soc Lond B Biol Sci* 2015;370:20130553.
- 819 [61] Araujo SB, Braga MP, Brooks DR, Agosta SJ, Hoberg EP, von Hartenthal FW, et al. Understanding  
820 host-switching by ecological fitting. *PLoS ONE* 2015;10:e0139225.
- 821 [62] Kramer JM. *Extracellular Matrix*. In *C. elegans*. New York: Cold Spring Harbor Laboratory Press;1997.
- 822 [63] Lin Q, Li HM, Gao M, Wang XY, Ren WX, Cong MM. et al. Characterization of *Baylisascaris schroederi*  
823 from Qinling subspecies of giant panda in China by the first internal transcribed spacer (ITS-1) of nuclear  
824 ribosomal DNA. *Parasitol Res* 2012;110:1297-303.
- 825 [64] Marçais G, Kingsford C. A fast, lock-free approach for efficient parallel counting of occurrences of k-mers.  
826 *Bioinformatics* 2011;27:764-70.
- 827 [65] Ranallo-Benavidez TR, Jaron KS, Schatz MC. GenomeScope 2.0 and Smudgeplot for reference-free  
828 profiling of polyploid genomes. *Nat Commun* 2020;11:1432.
- 829 [66] Lewis RE, Czech MP. Phospholipid environment alters hormone-sensitivity of the purified insulin receptor  
830 kinase. *Biochem J* 1987;248:829-36.
- 831 [67] Walker BJ, Abeel T, Shea T, Priest M, Abouelliel A, Sakthikumar S. et al. Pilon: an integrated tool for  
832 comprehensive microbial variant detection and genome assembly improvement. *PLoS ONE* 2014;9:e112963.
- 833 [68] Roach MJ, Schmidt SA, Borneman AR. Purge Haplotigs: allelic contig reassignment for third-gen diploid  
834 genome assemblies. *BMC Bioinformatics* 2018;19:460.
- 835 [69] Waterhouse RM, Seppey M, Simão FA, Manni M, Ioannidis P, Klioutchnikov G. et al. BUSCO Applications  
836 from Quality Assessments to Gene Prediction and Phylogenomics. *Mol Biol Evol* 2018;35:543-8.
- 837 [70] Lowe TM, Chan PP. tRNAscan-SE On-line: integrating search and context for analysis of transfer RNA  
838 genes. *Nucleic Acids Res* 2016;44:W54-7.
- 839 [71] Kalvari I, Argasinska J, Quinones-Olvera N, Nawrocki EP, Rivas E, Eddy SR. et al. Rfam 13.0: shifting to a  
840 genome-centric resource for non-coding RNA families. *Nucleic Acids Res* 2018;46:D335-42.
- 841 [72] Perteau M, Kim D, Perteau GM, Leek JT, Salzberg SL. Transcript-level expression analysis of RNA-seq  
842 experiments with HISAT, StringTie and Ballgown. *Nat Protoc* 2016;11:1650-67.
- 843 [73] Niknafs YS, Pandian B, Iyer HK, Chinnaiyan AM, Iyer MK. TACO produces robust multisample  
844 transcriptome assemblies from RNA-seq. *Nat Methods* 2017;14:68-70.
- 845 [74] Haas BJ, Papanicolaou A, Yassour M, Grabherr M, Blood PD, Bowden J. et al. De novo transcript sequence  
846 reconstruction from RNA-seq using the Trinity platform for reference generation and analysis. *Nat Protoc*  
847 2013;8:1494-512.
- 848 [75] Hoff KJ, Lange S, Lomsadze A, Borodovsky M, Stanke M. BRAKER1: Unsupervised RNA-Seq-based  
849 genome annotation with GeneMark-ET and AUGUSTUS. *Bioinformatics* 2016;32:767-9.
- 850 [76] Gremme G, Brendel V, Sparks ME, Kurtz S. Engineering a software tool for gene structure prediction in  
851 higher organisms. *Inform Software Tech* 2015;47:965-78.
- 852 [77] Haas BJ, Salzberg SL, Zhu W, Perteau M, Allen JE, Orvis J. et al. Automated eukaryotic gene structure  
853 annotation using EVIDENCEModeler and the program to assemble spliced alignments. *Genome Biol*  
854 2008;9:R7.

- 855 [78] Trapnell C, Roberts A, Goff L, Pertea G, Kim D, Kelley DR. et al. Differential gene and transcript expression  
856 analysis of RNA-seq experiments with TopHat and Cufflinks. *Nat Protoc* 2012;7:562-78.
- 857 [79] NCBI Resource Coordinators. Database resources of the National Center for Biotechnology Information.  
858 *Nucleic Acids Res* 2018;46:D8-13.
- 859 [80] Kanehisa M, Furumichi M, Tanabe M, Sato Y, Morishima K. KEGG: new perspectives on genomes,  
860 pathways, diseases and drugs. *Nucleic Acids Res* 2017;45:D353-61.
- 861 [81] Altschul SF, Gish W, Miller W, Myers EW, Lipman DJ. Basic local alignment search tool. *J Mol Biol*  
862 1990;215:403-10.
- 863 [82] Jones P, Binns D, Chang HY, Fraser M, Li W, McAnulla C. et al. InterProScan 5: genome-scale protein  
864 function classification. *Bioinformatics* 2014;30:1236-40.
- 865 [83] Emms DM, Kelly S. OrthoFinder: solving fundamental biases in whole genome comparisons dramatically  
866 improves orthogroup inference accuracy. *Genome Biol* 2015;16:157-7.
- 867 [84] De Bie T, Cristianini N, Demuth JP, Hahn MW. CAFE: a computational tool for the study of gene family  
868 evolution. *Bioinformatics* 2006;22:1269-71.
- 869 [85] Sievers F, Higgins DG. Clustal Omega for making accurate alignments of many protein sequences. *Protein*  
870 *Sci* 2018;27:135-45.
- 871 [86] Capella-Gutiérrez S, Silla-Martínez JM, Gabaldón T. trimAl: a tool for automated alignment trimming in  
872 large-scale phylogenetic analyses. *Bioinformatics* 2009;25:1972-3.
- 873 [87] Darriba D, Taboada GL, Doallo R, Posada D. ProtTest 3: fast selection of best-fit models of protein evolution.  
874 *Bioinformatics* 2011;27:1164-5.
- 875 [88] Stamatakis A. RAxML version 8: a tool for phylogenetic analysis and post-analysis of large phylogenies.  
876 *Bioinformatics* 2014;30:1312-3.
- 877 [89] Bouckaert R, Vaughan TG, Barido-Sottani J, Duchêne S, Fourment M, Gavryushkina A. et al. BEAST 2.5:  
878 an Advanced software platform for Bayesian evolutionary analysis. *PLoS Comput Biol* 2019;15:e1006650.
- 879 [90] Yang Z. PAML 4: phylogenetic analysis by maximum likelihood. *Mol Biol Evol* 2007;24:1586-91.
- 880 [91] Li B, Dewey CN. RSEM: accurate transcript quantification from RNA-Seq data with or without a reference  
881 genome. *BMC Bioinformatics* 2011;12:323.
- 882 [92] Robinson MD, McCarthy DJ, Smyth GK. EdgeR: a bioconductor package for differential expression analysis  
883 of digital gene expression data. *Bioinformatics* 2010;26:139-40.
- 884 [93] Kumar L, E Futschik M. Mfuzz: a software package for soft clustering of microarray data. *Bioinformatics*  
885 2007;23:5-7.
- 886 [94] Maere S, Heymans K, Kuiper M. BiNGO: a Cytoscape plugin to assess overrepresentation of gene ontology  
887 categories in biological networks. *Bioinformatics* 2005;21:3448-9.
- 888 [95] Shannon P, Markiel A, Ozier O, Baliga NS, Wang JT, Ramage D. et al. Cytoscape: a software environment  
889 for integrated models of biomolecular interaction networks. *Genome Res* 2003;13:2498-504.

## 890 **Figure captions**

### 891 **Figure 1 Genomic features of the *Baylisascaris schroederi* genome**

892 The rings depict the following information with a window size of 100 kb: (a) Illumina sequencing  
893 coverage, (b) PacBio sequencing coverage, (c) repeat density, (d) gene density, (e) GC content, and  
894 (f) to (i) gene expression levels at the egg, L2, L5 and adult stages of *B. schroederi*, respectively.

895

### 896 **Figure 2 Phylogeny and inferred host shifts of *B. schroederi* and related ascaridoid 897 species**

898 **A.** The phylogenetic tree and divergence times of four ascaridoids and their hosts. The above tree of  
899 shows the relationship of the ascaridoid hosts include pigs, horses, giant pandas and dogs, which is  
900 estimated based on previous studies [22, 24]; the bottom tree shows the relationship of the  
901 ascaridoids included in this study, which is inferred based on 329 single-copy orthologs using  
902 RAxML and BEAST2. The color branches in the bottom tree indicate different ascaridoid species.  
903 The circles indicate species differentiation and the pentagrams denote host shifts and speciation.  
904 The dashed lines, circles, and pentagrams float on the host tree are transcribed from the ascaridoid  
905 tree. The arrows and corresponding lines indicate the direction of host shifts. **B.** Ks distribution of  
906 homologous genes among the four ascaridoids. **C.** GO enrichment of differentiation genes, which  
907 are mainly enriched in transferase, transporter, metalloendopeptidase, transmembrane transporter  
908 and ion channel.

909

### 910 **Figure 3 Nutrient transport and metabolism of *B. schroederi***

911 *B. schroederi* absorbs nutrients such as sugars, amino acids and fatty acids from the gut of giant  
912 pandas through transport proteins to enter cells and carry out metabolic processes in the cells.  
913 Different colored lines indicate different metabolic pathways: green, sugar metabolism; red, TCA  
914 cycle; blue, amino acid synthesis; dark brown, fatty acid synthesis; brown, glycogen synthesis; and  
915 pink, chitin metabolism. The dots indicate metabolic substrates or products. The number indicates  
916 the EC number of the enzyme, the double arrow shows that the enzyme-encoding gene that  
917 catalyzes the indicated step is expanded, and the asterisk means that the enzyme-encoding gene was  
918 under positive selection. The four colored boxes indicate the expression levels of the  
919 enzyme-encoding genes during the four developmental stages including eggs, L2s, L5s, and adult  
920 females.

921

### 922 **Figure 4 Composition of and related gene expression in the *B. schroederi* cuticle**

923 Cuticle of *B. schroederi* is magnified from its transverse section model to illustrate its structure that  
924 includes the surface coat (I), epicuticle (II) and cortical (III), medial (VI) and basal layers (V) and

925 composition that is made up of collagens, cuticlins, chitin and lipids. Transcriptome analysis  
926 showed significantly differential expression of the genes involved in biosynthesis of cuticle  
927 collagens and cuticlins during the development of *B. schroederi*. Within the biosynthesis of cuticlins  
928 and collagens, cuticlins are enzymatically polymerized to constrict the seam cell-derived cuticle and  
929 form the distinctive cuticular alae, which are predominant in the outermost cortical layers; while  
930 collagens are synthesized through a multistep process that includes prolyl 4-hydroxylation,  
931 procollagen registration and trimerization, transport from the endoplasmic reticulum, and  
932 procollagen processing and cross-linking, which results in construction of the major component of  
933 the extracellular matrix of the epicuticle and cortical, medial and basal layers of the nematode  
934 cuticle. For expression levels of genes related to biosynthesis of collagens, the mean centered  
935 log-fold change in expression is plotted for each of three biological replicates at each life stage in  
936 the following order: eggs, L2s, L5s, and adult females. All genes in each cluster are drawn with  
937 different colors. The red and blue bars indicate low and high deviation from the consensus profile,  
938 respectively.

939

940 **Figure 5 Cuticle thickness and expanded genes related to cuticle biosynthesis in**  
941 **ascaridoids**

942 **A.** Cuticle thickness of *B. schroederi*, *A. suum*, *P. univalens* and *T. canis* under 400 $\times$ . The scale bars  
943 denote 20  $\mu$ m. **B.** The genes encoding cuticle collagens are presented in tandem on the genome.  
944 Green means that the genes are on the positive strand while red means that the genes are on the  
945 negative strand. **C.** The Pfam domain of cuticle collagens that includes one “nematode cuticle  
946 collagen N-terminal domain” and two “collagen triple helix repeat (20 copies)”. **D.** Genes encoding  
947 nematode cuticle collagens were tandemly duplicated in syntenic blocks between *B. schroederi* and  
948 *A. suum/P. univalens*. The highlight colors represent genes encoding nematode cuticle collagens,  
949 and the dimmed colors represent other genes in syntenic blocks.

950

951 **Figure 6 Example of differential gene expression clusters during the *B. schroederi* life cycle**

952 The developmental transcriptomes of *B. schroederi* were sequenced in triplicate at four stages  
953 across the lifecycle (1st order): embryonated eggs (eggs); the second-stage larvae (L2s); the  
954 intestine-inhabited fifth-stage larvae (L5s); and adult females. A subset of the 11,510 differentially  
955 expressed genes (FDR<0.001, min fold=4) were grouped into expression clusters that describe the  
956 genes specifically upregulated at various life stages. Clusters that uniquely describe each life stage  
957 and describe two life stages are identified (2nd order). For all expression clusters, the mean centered  
958 log-fold change in expression is plotted for each of three biological replicates at each life stage in  
959 the following order: eggs, L2s, L5s, and adult females. All genes in each cluster are drawn with

960 different colors. The red and blue bars indicate low and high deviation from the consensus profile,  
961 respectively.

962

## 963 **Tables**

964 **Table 1 Statistics of the genome features of four ascaridoid species**

965

## 966 **Supplementary materials**

967 **File S1 Supplementary note**

968

969 **Figure S1 Lifecycle of *B. schroederi* in the giant panda**

970 Fertilized eggs are excreted into the environment with feces. After one molt within the eggs, the  
971 embryos develop through first-stage larvae (L1s) to second-stage larvae (L2s). Host infections start  
972 with the oral intake of L2-containing infective eggs, and the L2s then hatch in the gastrointestinal  
973 tract and penetrate the intestinal walls of the host. The L2s are transported through the mesenterial  
974 blood veins to various organs (such as the liver and lungs) and induce visceral larva migrans (VLM).  
975 With further development to third-stage larvae (L3s), these larvae undergo hepatopulmonary and  
976 somatic migrations and are eventually swallowed again. In the small intestine, the third-stage larvae  
977 molt twice through the fourth and fifth stages and reach maturity. Dioecious adults mate, and the  
978 females can begin to excrete fertilized eggs again. It has been estimated that the lifecycle can be  
979 completed within three months. The adults can lead to abdominal pain, diarrhea, and potentially  
980 life-threatening intestinal blockage (IB) in giant pandas.

981

982 **Figure S2 Hi-C contact map of the *B. schroederi* genome with 27 chromosome-level  
983 pseudomolecules**

984 The signal represents two contact positions.

985

986 **Figure S3 Synteny comparison of *B. schroederi* and *A. suum***

987 The gray bands represent *A. suum* chromosomes, and the colorful bands note *B. schroederi*  
988 chromosomes. The links represent one-to-one orthologs between two species.

989

990 **Figure S4 Summary of tRNA gene content in *B. schroederi* and *C. elegans***

991 **A.** *B. schroederi* tRNA gene content and codon usage. **B.** The tRNA gene content and codon usage  
992 exhibit a high correlation in *B. schroederi*. **C.** *C. elegans* tRNA gene content and codon usage. **D.**

993 The tRNA gene content and codon use show a high correlation in *C. elegans*.

994

995 **Figure S5 Venn diagram of homologous genes**

996 Venn diagram showing the number of orthologs between *B. schroederi* and three other ascaridoid  
997 species (*A. suum*, *P. univalens* and *T. canis*) after pairwise comparisons.

998

999 **Figure S6 Global phylogeny among nematode representatives of the phylum Nematoda with**  
1000 **sequenced genomes**

1001 The phylogenetic tree was constructed using concatenated amino acid sequences for 329  
1002 single-copy genes present in 12 genomes through maximum likelihood analysis. The numbers at the  
1003 nodes indicate bootstrap values, and the number on each branch shows the distance.

1004

1005 **Figure S7 Estimation of the divergence time**

1006 The times of divergence were estimated through an analysis of 1:1:1 orthologs between *B.*  
1007 *schroederi* and 11 other nematodes, including three ascaridoid species, *A. suum*, *P. univalens* and *T.*  
1008 *canis*. The distances are shown in million years ago (Mya).

1009

1010 **Figure S8 Ascaridoid orthologous gene similarity index**

1011 **A.** Similarity index of orthologous genes of *T. canis* and *A. suum*, *P. univalens*, and *B. schroederi*. **B.**  
1012 Similarity index of orthologous genes of *B. schroederi* and *A. suum*, *P. univalens*. A higher  
1013 similarity index indicates that the homologous genes are more similar. The p-value indicates  
1014 whether the similarity difference between different species is significant.

1015

1016 **Figure S9 Cuticle thickness of ascaridoids**

1017 **A.** Cuticle thickness of *B. schroederi* under a microscope (left: 40×, middle: 200×, right: 400×).  
1018 Cuticle thickness of *A. suum* (**B**), *P. univalens* (**C**) and *T. canis* (**D**), respectively, under the  
1019 microscope (left: 40×, middle: 200×, right: 400×).

1020

1021 **Figure S10 Cuticle thickness of *Baylisascaris transfuga***

1022 Cuticle thickness of the congeneric *Baylisascaris transfuga* under the microscope at magnifications  
1023 40× (**A**), 100× (**B**) and 200× (**C**), respectively.

1024

1025 **Figure S11 Sequencing coverage of the region where collagens are tandem expansion genes**

1026 The uniform coverage indicates that gene expansion exists and is not caused by assembly errors.

- 1027 **Figure S12 Clustering analysis of gene expression in *B. schroederi* at four stages**  
1028 Twenty-five clusters were associated with the egg, L2, L5 and adult stages of *B. schroederi* based  
1029 on the extent of shared genes among them, and each cluster was characterized primarily by a high  
1030 level of gene expression at one of the four developmental stages.  
1031
- 1032 **Figure S13 Genome survey of *B. schroederi***  
1033 The K-mer frequency was calculated with Jellyfish, and GenomeScope was used to estimate the  
1034 genome size, heterozygosity and repeat content of *B. schroederi*.  
1035
- 1036 **Supplementary Table 1 Statistics of the *B. schroederi* genomic sequencing data**  
1037
- 1038 **Supplementary Table 2 Assessment of the quality of the *B. schroederi* draft genome**  
1039
- 1040 **Supplementary Table 3 BUSCO analysis**  
1041
- 1042 **Supplementary Table 4 Mapping rate of RNA-seq data against the *B. schroederi* genome**  
1043
- 1044 **Supplementary Table 5 Summary of repeats in the *B. schroederi* genome**  
1045
- 1046 **Supplementary Table 6 Statistics of tRNAs and rRNAs in the *B. schroederi* genome**  
1047
- 1048 **Supplementary Table 7 Summary of tRNA genes in the *B. schroederi* genome**  
1049
- 1050 **Supplementary Table 8 Statistics of gene models of *B. schroederi***  
1051
- 1052 **Supplementary Table 9 Genes supported by RNA-seq data from *B. schroederi***  
1053
- 1054 **Supplementary Table 10 Functional annotation of genes in *B. schroederi***  
1055
- 1056 **Supplementary Table 11 Orthologous genes of *B. schroederi* linked to one or more known**  
1057 **KEGG pathways in *C. elegans***  
1058
- 1059 **Supplementary Table 12 Antimicrobial effectors identified from *B. schroederi***  
1060

|      |                                |                                                                                           |
|------|--------------------------------|-------------------------------------------------------------------------------------------|
| 1061 | <b>Supplementary Table 13a</b> | <b>Divergent genes among <i>B. schroederi</i>, <i>A. suum</i> and <i>P. univalens</i></b> |
| 1062 |                                |                                                                                           |
| 1063 | <b>Supplementary Table 13b</b> | <b>GO enrichment of divergent genes</b>                                                   |
| 1064 |                                |                                                                                           |
| 1065 | <b>Supplementary Table 14</b>  | <b>Genes inferred to be associated with host shift during the</b>                         |
| 1066 |                                | <b>evolutionary history of ascaridoids</b>                                                |
| 1067 |                                |                                                                                           |
| 1068 | <b>Supplementary Table 15a</b> | <b>Expanded gene families of <i>B. schroederi</i></b>                                     |
| 1069 |                                |                                                                                           |
| 1070 | <b>Supplementary Table 15b</b> | <b>GO enrichment of genes from expanded gene families of <i>B.</i></b>                    |
| 1071 |                                | <b><i>schroederi</i></b>                                                                  |
| 1072 |                                |                                                                                           |
| 1073 | <b>Supplementary Table 16a</b> | <b>Positively selected genes identified in <i>B. schroederi</i></b>                       |
| 1074 |                                |                                                                                           |
| 1075 | <b>Supplementary Table 16b</b> | <b>GO enrichment of positively selected genes identified in <i>B.</i></b>                 |
| 1076 |                                | <b><i>schroederi</i></b>                                                                  |
| 1077 |                                |                                                                                           |
| 1078 | <b>Supplementary Table 17</b>  | <b>Genes encoding nematode cuticle collagens and cuticlins identified</b>                 |
| 1079 |                                | <b>in <i>B. schroederi</i></b>                                                            |
| 1080 |                                |                                                                                           |
| 1081 | <b>Supplementary Table 18</b>  | <b>Comparison of the cuticles of ascaridoid species</b>                                   |
| 1082 |                                |                                                                                           |
| 1083 | <b>Supplementary Table 19</b>  | <b>GO enrichment of high expression genes in the different</b>                            |
| 1084 |                                | <b>developmental stages of <i>B. schroederi</i></b>                                       |
| 1085 |                                |                                                                                           |
| 1086 | <b>Supplementary Table 20</b>  | <b>GO enrichment of down/up-regulated genes between</b>                                   |
| 1087 |                                | <b>developmental stages in <i>B. schroederi</i></b>                                       |
| 1088 |                                |                                                                                           |
| 1089 | <b>Supplementary Table 21</b>  | <b>Drug target candidates in <i>B. schroederi</i></b>                                     |
| 1090 |                                |                                                                                           |
| 1091 | <b>Supplementary Table 22</b>  | <b>Excretory/secretory (E/S) proteins of <i>B. schroederi</i></b>                         |
| 1092 |                                |                                                                                           |
| 1093 | <b>Supplementary Table 23</b>  | <b>Vaccine candidates in <i>B. schroederi</i></b>                                         |
| 1094 |                                |                                                                                           |



1095 **Table 1. Statistics of the genome features of four ascaridoid species.**

|                                     | <i>B. schroederi</i> | <i>A. suum</i> | <i>P. univalens</i> | <i>T. canis</i> |
|-------------------------------------|----------------------|----------------|---------------------|-----------------|
| <b>Versions</b>                     | BSFv2.0              | ASM18702v3     | ASM225920v1         | ADULT_r1.0      |
| <b>Genome size (bp)</b>             | 293,522,654          | 298,028,455    | 253,353,821         | 317,115,901     |
| <b>Scaffolds</b>                    | 150                  | 415            | 1,274               | 22,857          |
| <b>N50 (bp)</b>                     | 11,819,000           | 4,646,302      | 1,825,986           | 375,067         |
| <b>GC content (%)</b>               | 37.59                | 37.8           | 39.1                | 39.9            |
| <b>Repeat (%)</b>                   | 12.02                | 11.1           | 7.7                 | 12.9            |
| <b>Number of coding genes</b>       | 16,072               | 16,778         | 14,325              | 18,596          |
| <b>Gene density (gene/Mb)</b>       | 54.7                 | 56.3           | 56.5                | 58.6            |
| <b>Mean protein length (aa)</b>     | 492                  | 436            | 470                 | 385             |
| <b>BUSCO (complete/fragment, %)</b> | 92.2/5.7             | 89.1/7.2       | 91.0/5.8            | 87.0/8.0        |

1096

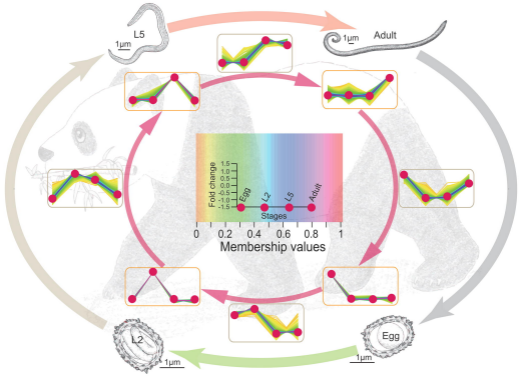

**A**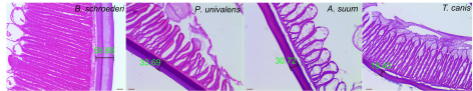**B**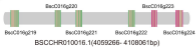**C**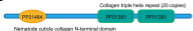**D**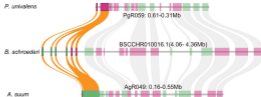

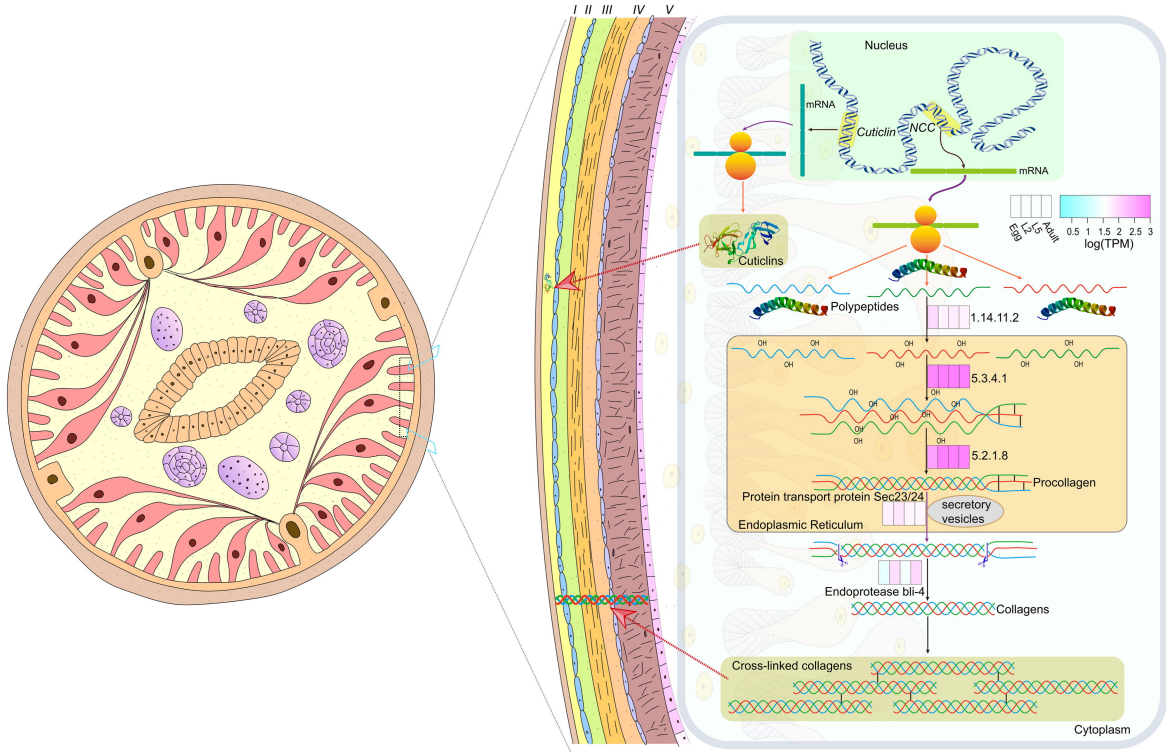

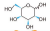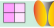

Sugar transporter

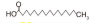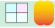

Long-chain-fatty-acid-CoA ligase

Egg L2  
Adult L5  
Stage

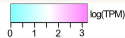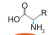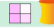

Amino acid transporter

ABC transporter

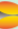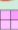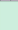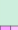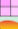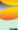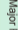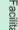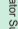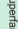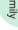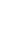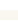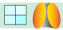

MFS/sugar transport protein

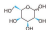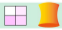

Neutral and basic amino acid transport protein

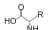

Excitatory amino acid transporter

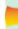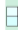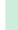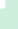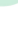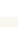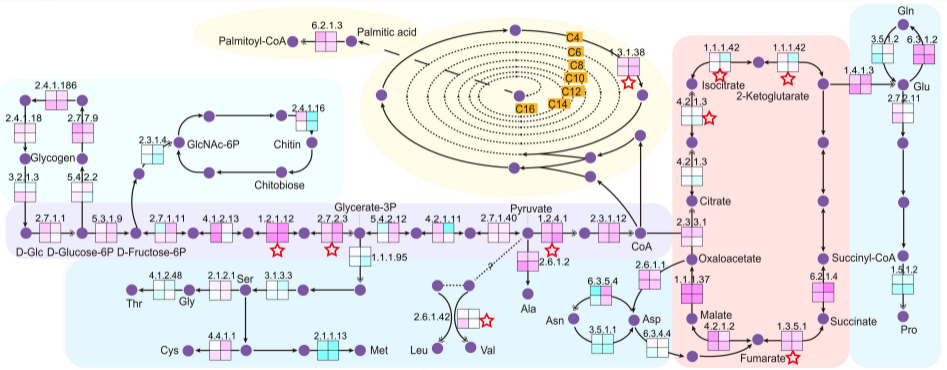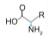

A

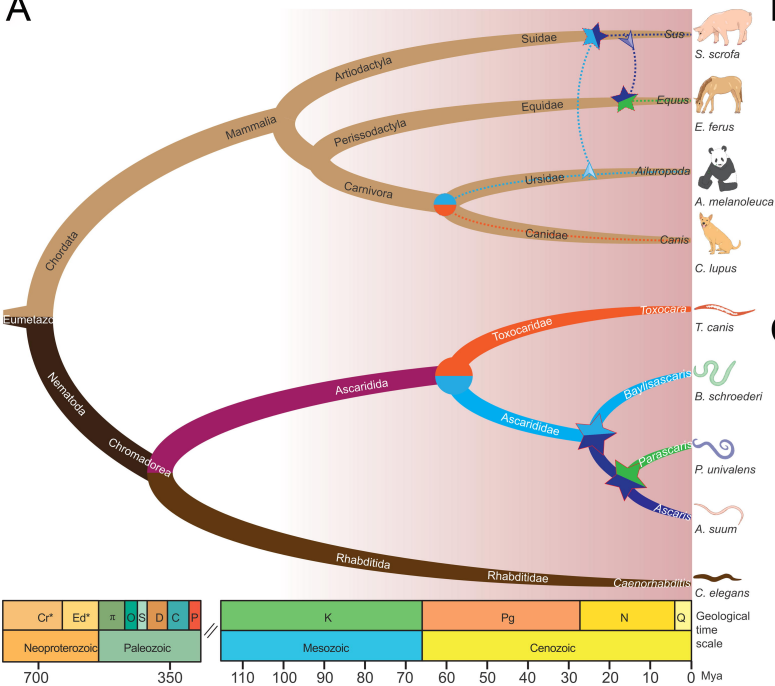

B

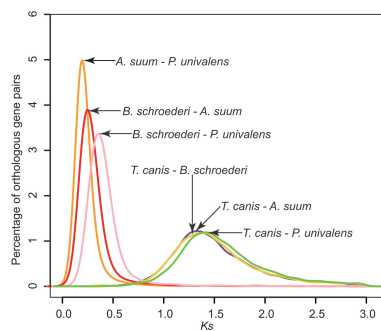

C

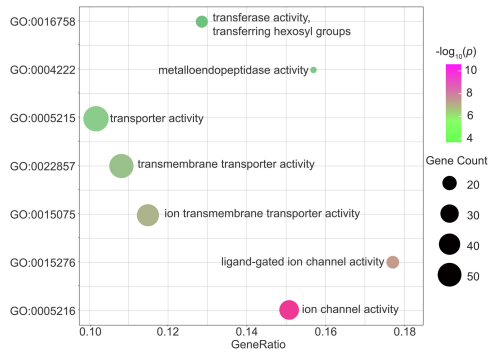

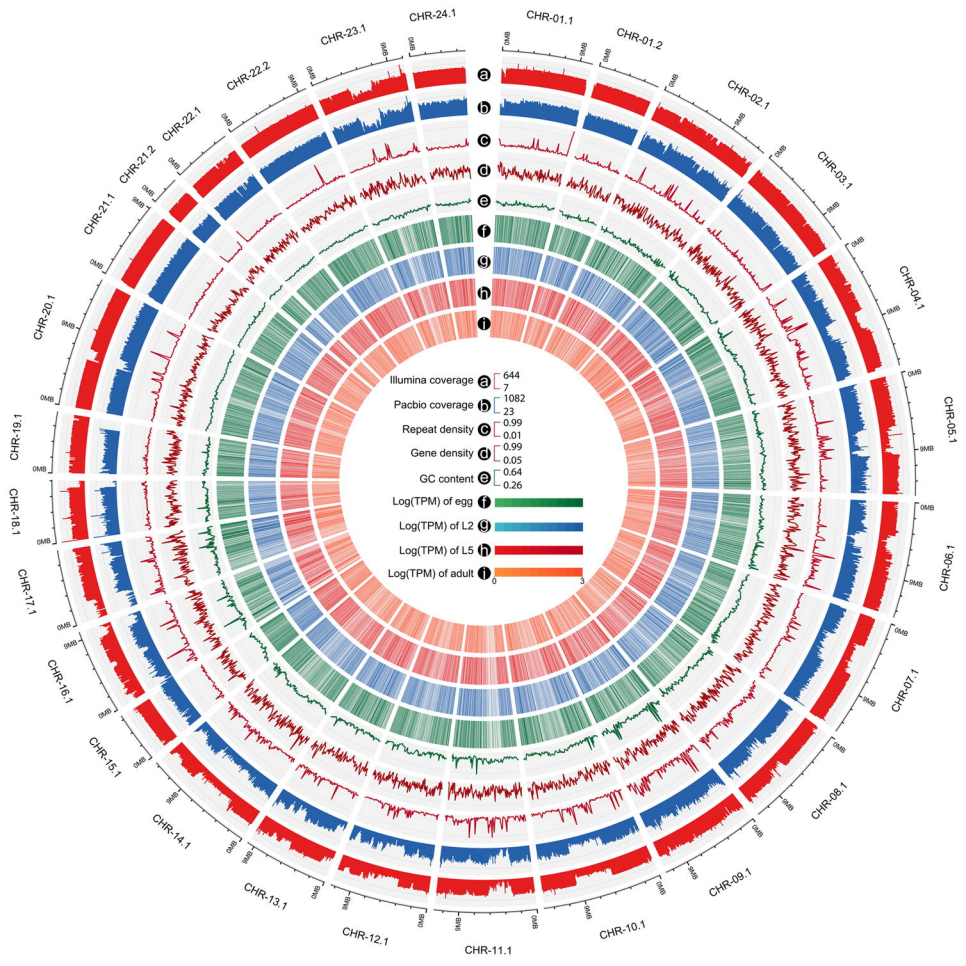

Source: https://biorxiv.org/content/10.1101/2021.05.29.446263v1.full.pdf
